# Supplementary material
Source: publisher figshare collection journal article supplement (https://tandf.figshare.com/articles/dataset/_/9678005)

## Kolmogorov-Smirnov tests and histograms for testing if contribution of results with higher RI changed the valve length distribution significantly

Slide: 54S-800m.2002-03.Cup1b.400µl.63x.ori, max. RI = 6

KS test whole population (n=300) vs. RI≤0 (n=136): p = 0.029 below 0.05  
 KS test whole population (n=300) vs. RI≤1 (n=231): p = 0.918  
 KS test whole population (n=300) vs. RI≤2 (n=270): p = 1  
 KS test whole population (n=300) vs. RI≤3 (n=287): p = 1  
 KS test whole population (n=300) vs. RI≤4 (n=293): p = 1  
 KS test whole population (n=300) vs. RI≤5 (n=299): p = 1

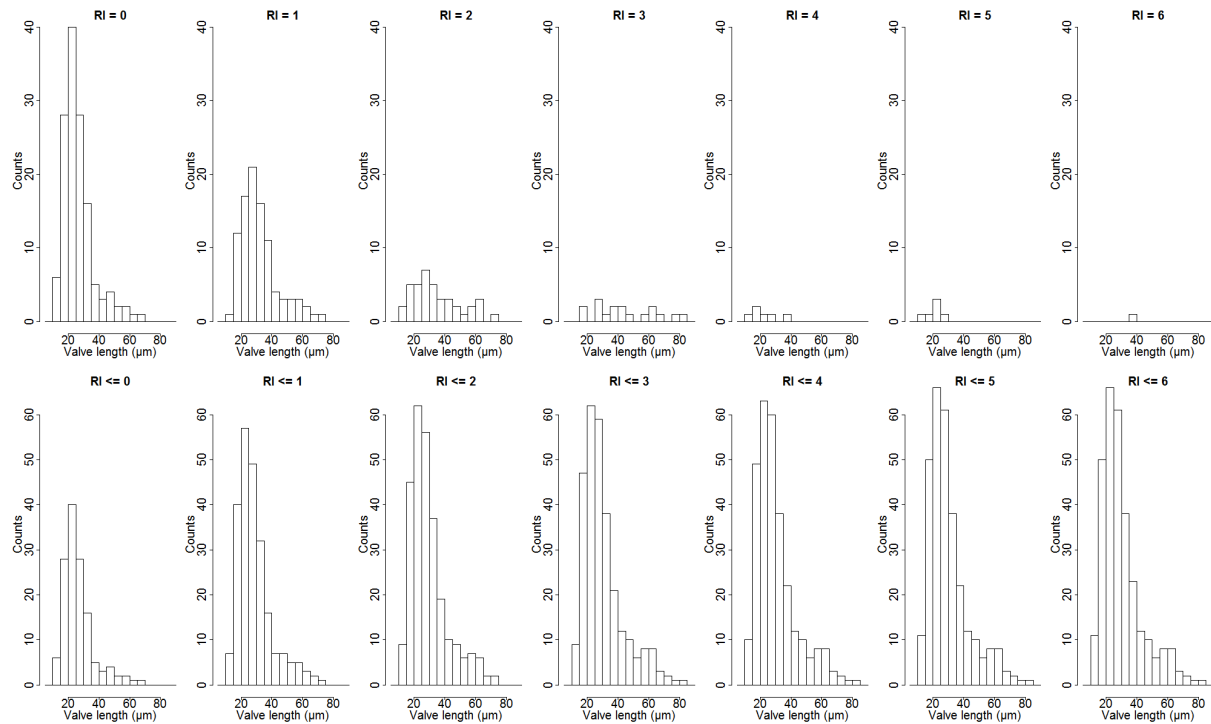

**Slide: 54S-800m.2002-03.Cup2a.400μl.63x.ori, max. RI = 2**

KS test whole population (n=569) vs. RI≤0 (n=281): p = 0.001  
 KS test whole population (n=569) vs. RI≤1 (n=491): p = 0.981

below 0.05

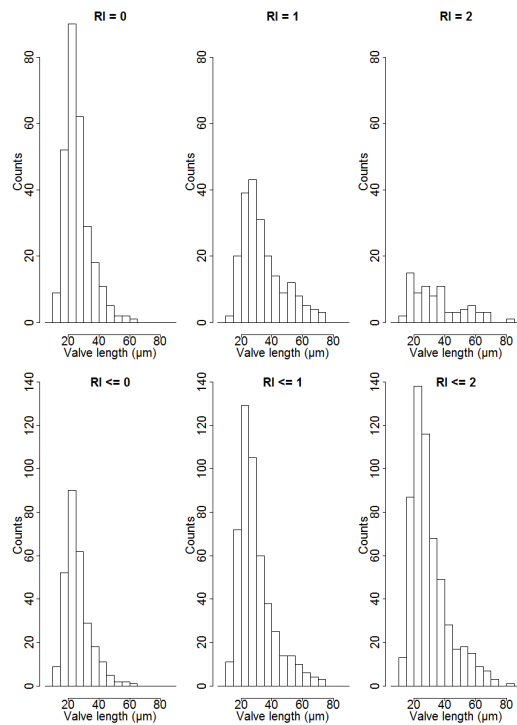

**Slide: 54S-800m.2002-03.Cup3b.100μl.63x.ori, max. RI = 2**

KS test whole population (n=525) vs. RI≤0 (n=267): p = 0.005  
 KS test whole population (n=525) vs. RI≤1 (n=442): p = 0.76

below 0.05

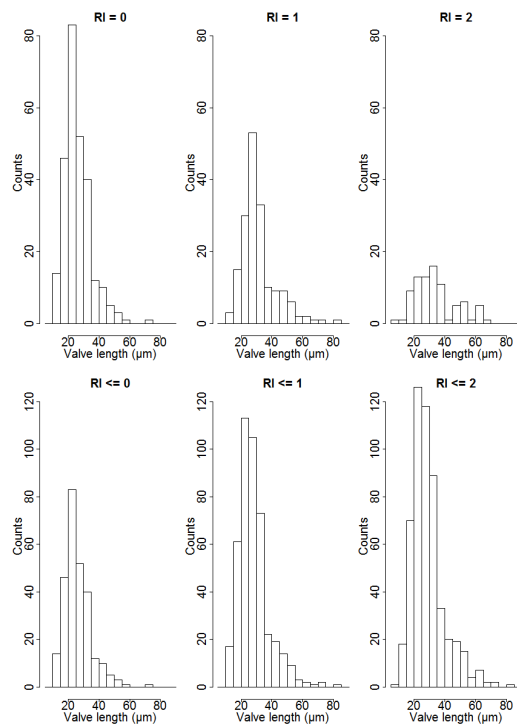

**Slide: 54S-800m.2002-03.Cup4a.100µl.63x.ori, max. RI = 3**

KS test whole population (n=178) vs. RI<=0 (n=70): p = 0.021 below 0.05

KS test whole population (n=178) vs. RI<=1 (n=116): p = 0.434

KS test whole population (n=178) vs. RI<=2 (n=145): p = 0.985

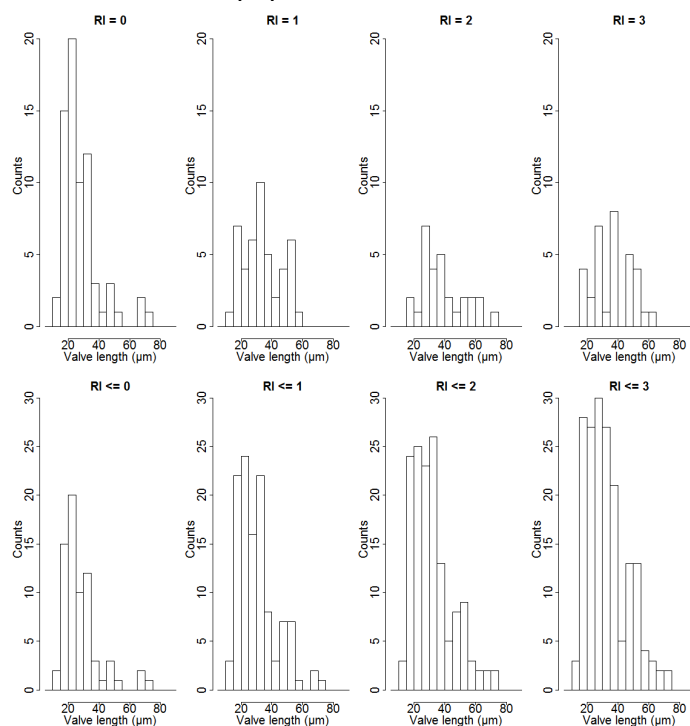

**Slide: 54S-800m.2002-03.Cup5.400µl.63x.ori, max. RI = 2**

KS test whole population (n=455) vs. RI<=0 (n=217): p = 0.089

KS test whole population (n=455) vs. RI<=1 (n=382): p = 0.954

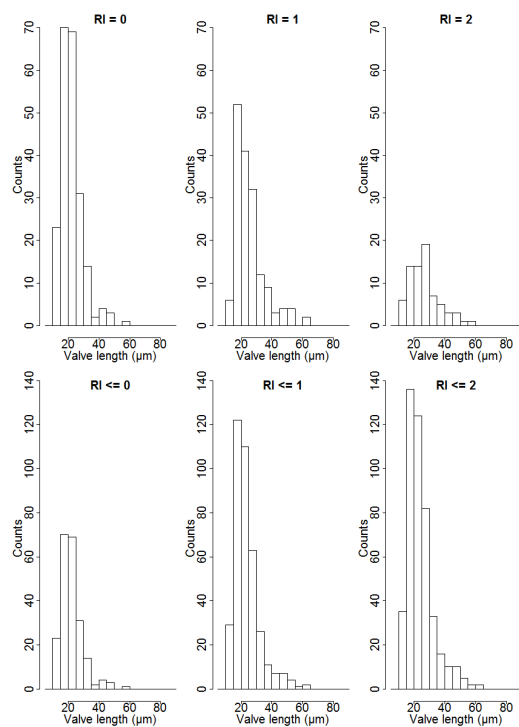

**Slide: 54S-800m.2002-03.Cup06.0.5ml.2.63x.ori, max. RI = 2**

KS test whole population (n=1630) vs. RI≤0 (n=433): p = 0.039 below 0.05  
 KS test whole population (n=1630) vs. RI≤1 (n=1105): p = 0.769

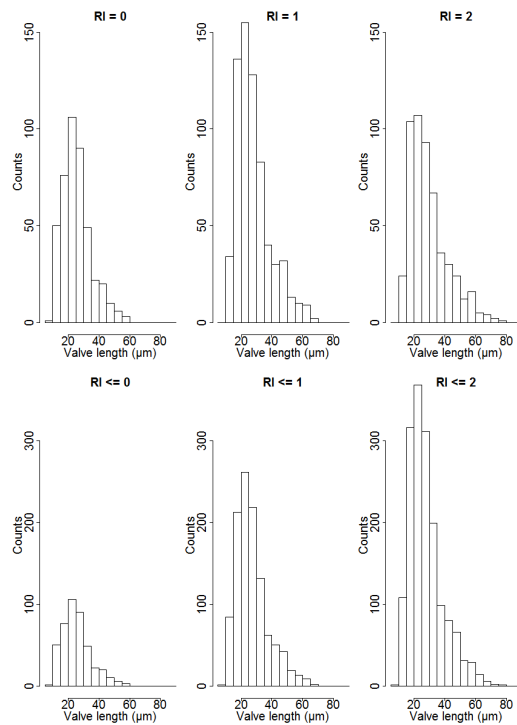

**Slide: 54S-800m.2002-03.Cup7.100μl.63x.ori, max. RI = 2**

KS test whole population (n=574) vs. RI≤0 (n=243): p = 0.473  
 KS test whole population (n=574) vs. RI≤1 (n=467): p = 1

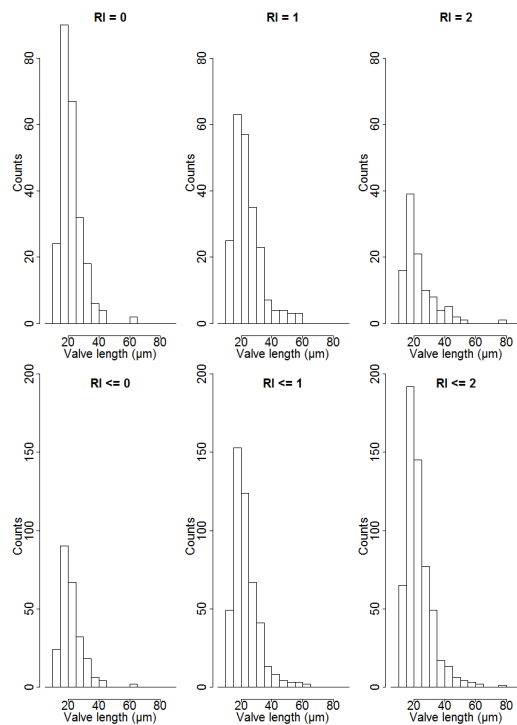

**Slide: 54S-800m.2002-03.Cup8.400µl.63x.ori, max. RI = 2**

KS test whole population (n=736) vs. RI≤0 (n=283): p = 0.006  
 KS test whole population (n=736) vs. RI≤1 (n=585): p = 0.778

below 0.05

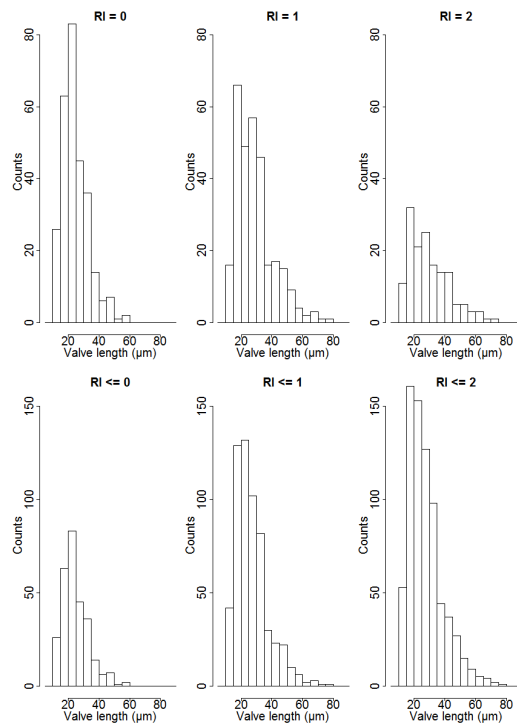

**Slide: 54S-800m.2002-03.Cup9.100µl.run3.63x.ori, max. RI = 2**

KS test whole population (n=1010) vs. RI≤0 (n=441): p = 0.004  
 KS test whole population (n=1010) vs. RI≤1 (n=826): p = 0.653

below 0.05

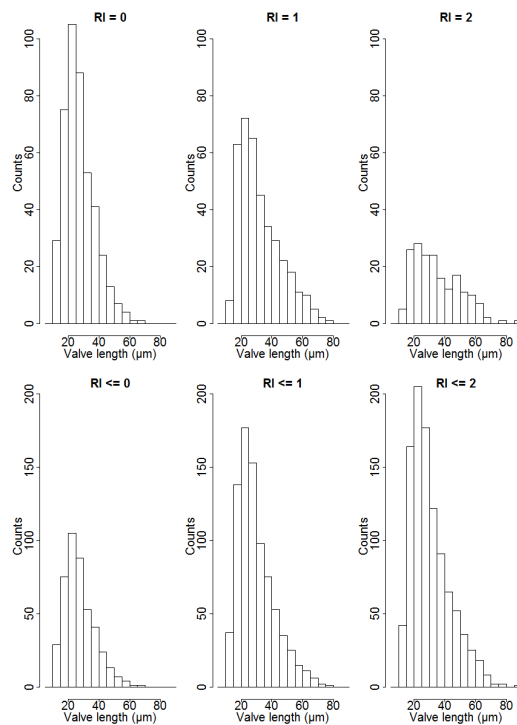

**Slide: 54S-800m.2002-03.Cup10.400µl.63x.ori, max. RI = 2**

KS test whole population (n=907) vs. RI≤0 (n=393): p = 0.003  
 KS test whole population (n=907) vs. RI≤1 (n=765): p = 0.697

below 0.05

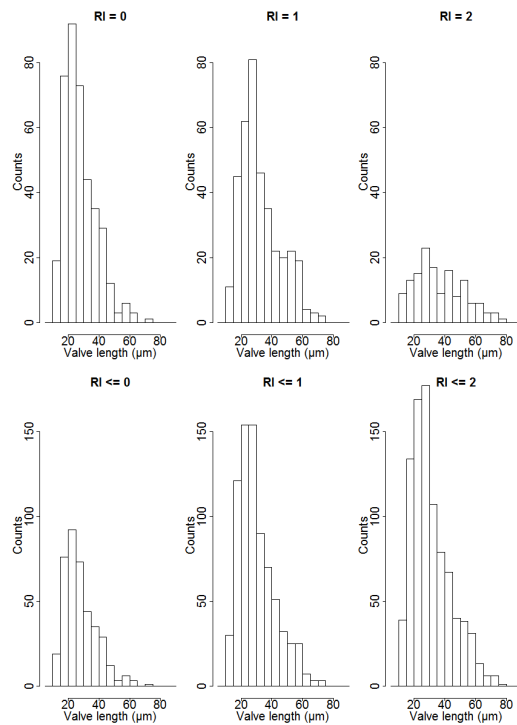

**Slide: 54S-800m.2002-03.Cup11.1000µl.2.63x.ori, max. RI = 3**

KS test whole population (n=223) vs. RI≤0 (n=69): p = 0.256  
 KS test whole population (n=223) vs. RI≤1 (n=148): p = 0.956  
 KS test whole population (n=223) vs. RI≤2 (n=193): p = 1

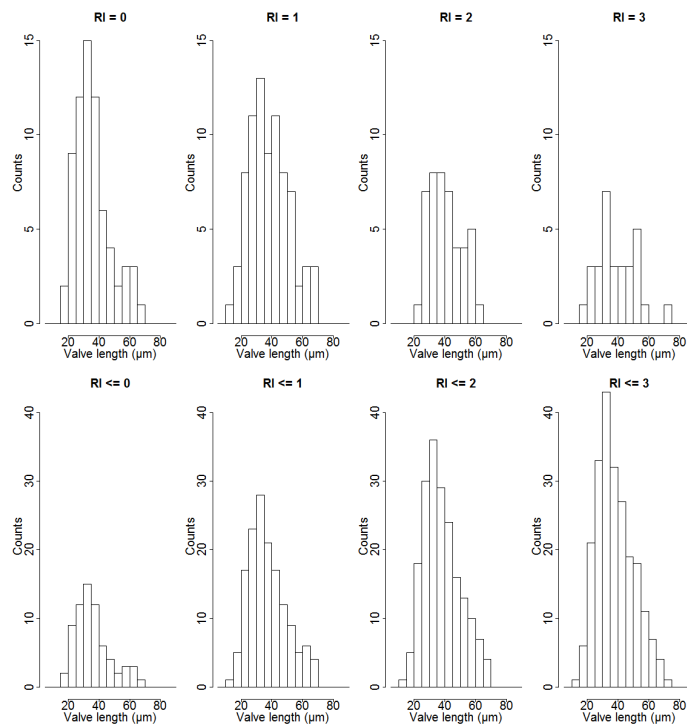

**Slide: 54S-800m.2002-03.Cup11.500µl.63x.ori, max. RI = 3**

KS test whole population (n=115) vs. RI<=0 (n=33): p = 0.103

KS test whole population (n=115) vs. RI<=1 (n=79): p = 0.997

KS test whole population (n=115) vs. RI<=2 (n=97): p = 1

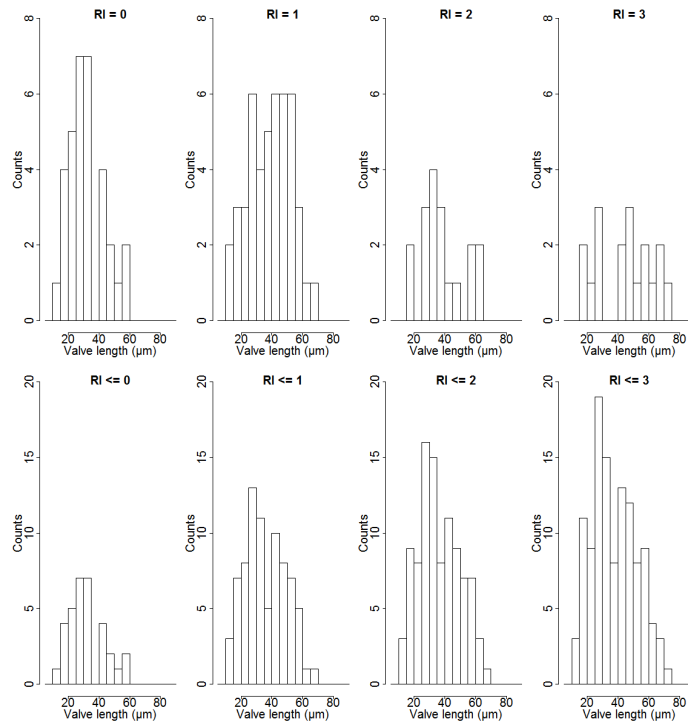

**Slide: 54S-800m.2002-03.Cup12.1000µl.63x.ori, max. RI = 3**

KS test whole population (n=409) vs. RI<=0 (n=143): p = 0 below 0.05

KS test whole population (n=409) vs. RI<=1 (n=296): p = 0.678

KS test whole population (n=409) vs. RI<=2 (n=373): p = 1

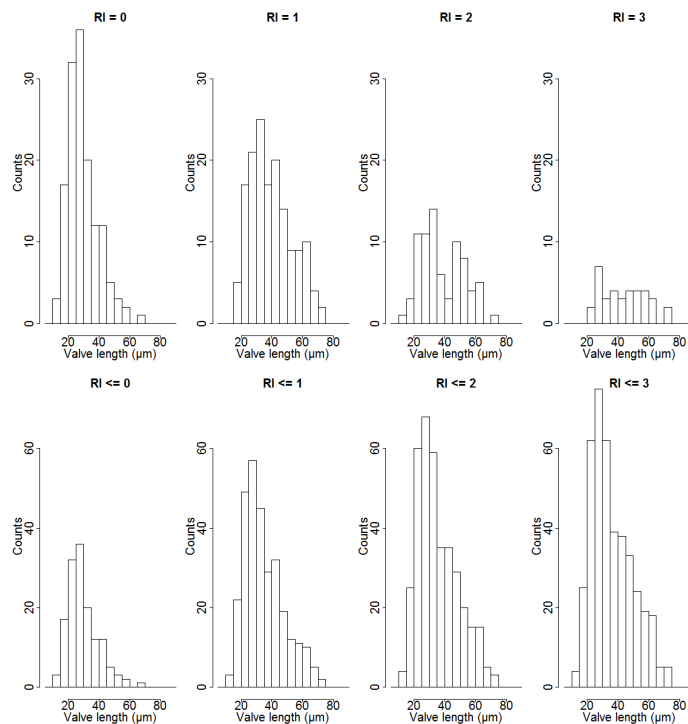

**Slide: 54S-800m.2002-03.Cup13.1000µl.63x.ori, max. RI = 6**

KS test whole population (n=310) vs. RI<=0 (n=81): p = 0.028 below 0.05  
 KS test whole population (n=310) vs. RI<=1 (n=166): p = 0.227  
 KS test whole population (n=310) vs. RI<=2 (n=208): p = 0.582  
 KS test whole population (n=310) vs. RI<=3 (n=249): p = 1  
 KS test whole population (n=310) vs. RI<=4 (n=270): p = 1  
 KS test whole population (n=310) vs. RI<=5 (n=289): p = 1

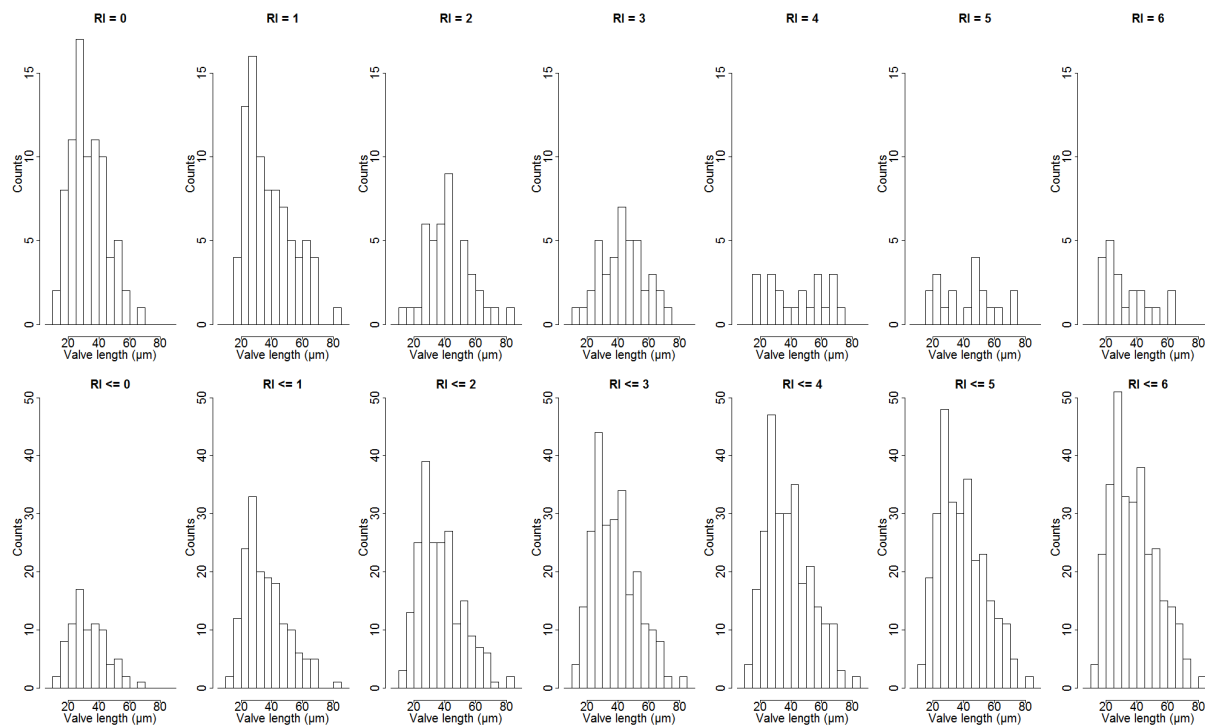



**Slide: 54S-800m.2002-03.Cup13.500μl.63x.ori, max. RI = 5**

KS test whole population (n=168) vs. RI≤0 (n=42): p = 0.446  
 KS test whole population (n=168) vs. RI≤1 (n=97): p = 0.713  
 KS test whole population (n=168) vs. RI≤2 (n=127): p = 1  
 KS test whole population (n=168) vs. RI≤3 (n=139): p = 1  
 KS test whole population (n=168) vs. RI≤4 (n=158): p = 1

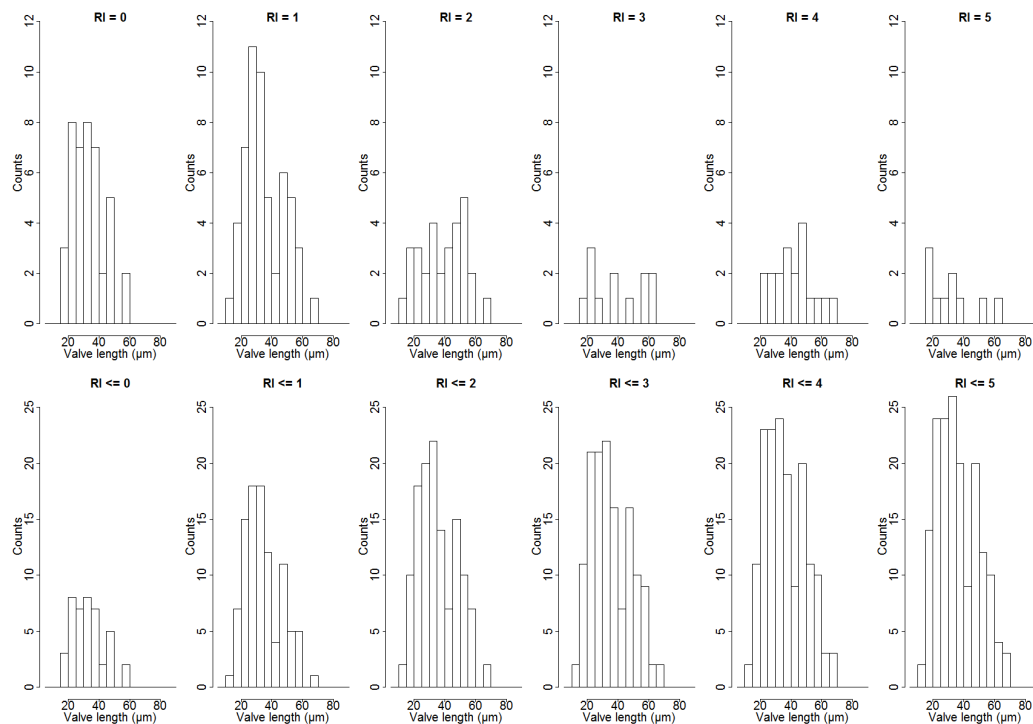

**Slide: 54S-800m.2002-03.Cup14.2000μl.63x.ori, max. RI = 2**

KS test whole population (n=420) vs. RI≤0 (n=141): p = 0.018      below 0.05  
 KS test whole population (n=420) vs. RI≤1 (n=311): p = 1

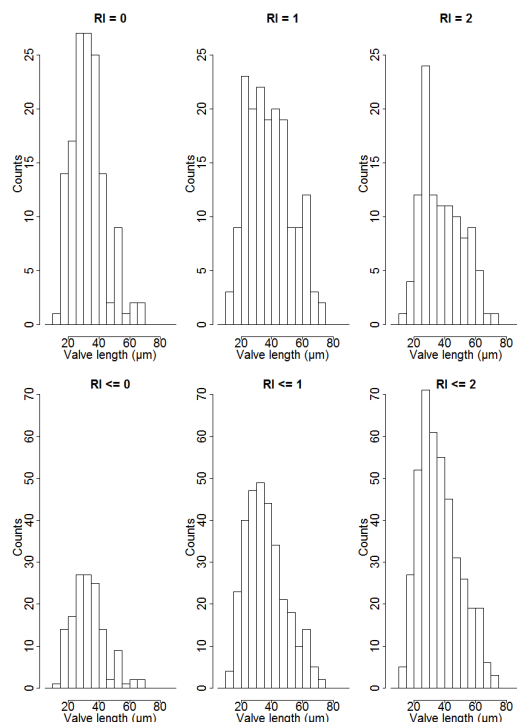

**Slide: 54S-800m.2002-03.Cup15.1ml.2.63x.ori, max. RI = 3**

KS test whole population (n=379) vs. RI<=0 (n=77): p = 0.025 below 0.05

KS test whole population (n=379) vs. RI<=1 (n=198): p = 0.888

KS test whole population (n=379) vs. RI<=2 (n=304): p = 1

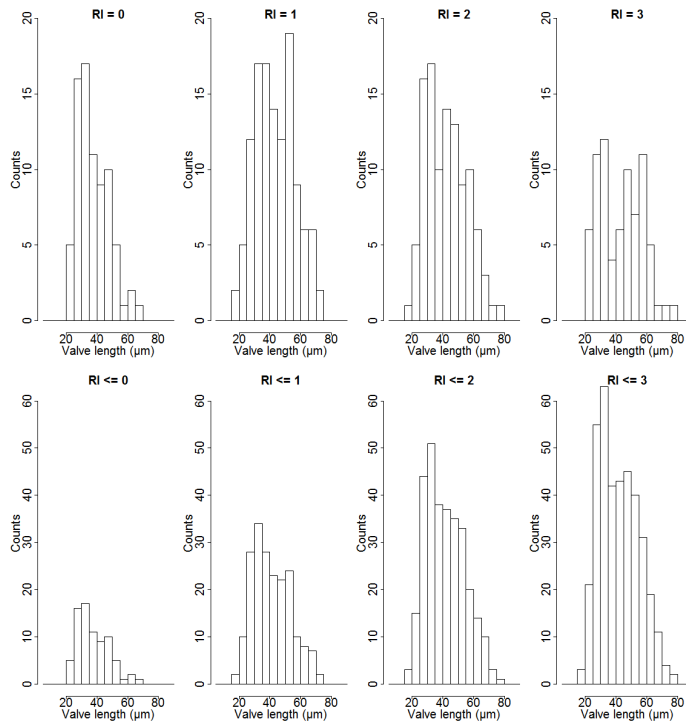

**Slide: 54S-800m.2002-03.Cup16.2000μl~F.Focus.64.63x.ori, max. RI = 6**

KS test whole population (n=145) vs. RI<=0 (n=26): p = 0.201

KS test whole population (n=145) vs. RI<=1 (n=72): p = 0.703

KS test whole population (n=145) vs. RI<=2 (n=99): p = 0.976

KS test whole population (n=145) vs. RI<=3 (n=120): p = 1

KS test whole population (n=145) vs. RI<=4 (n=131): p = 1

KS test whole population (n=145) vs. RI<=5 (n=139): p = 1

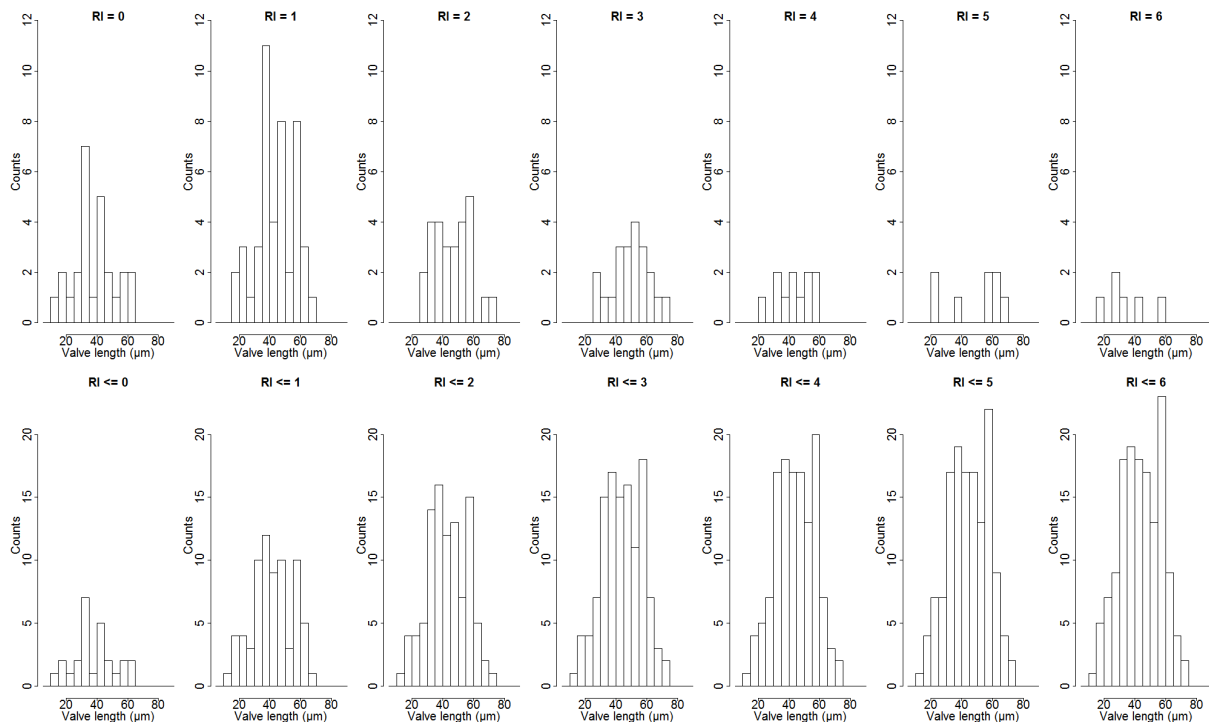

**Slide: 54S-800m.2002-03.Cup17.2000µl.63x.ori, max. RI = 2**

KS test whole population (n=793) vs. RI<=0 (n=294): p = 0.297  
 KS test whole population (n=793) vs. RI<=1 (n=617): p = 0.992

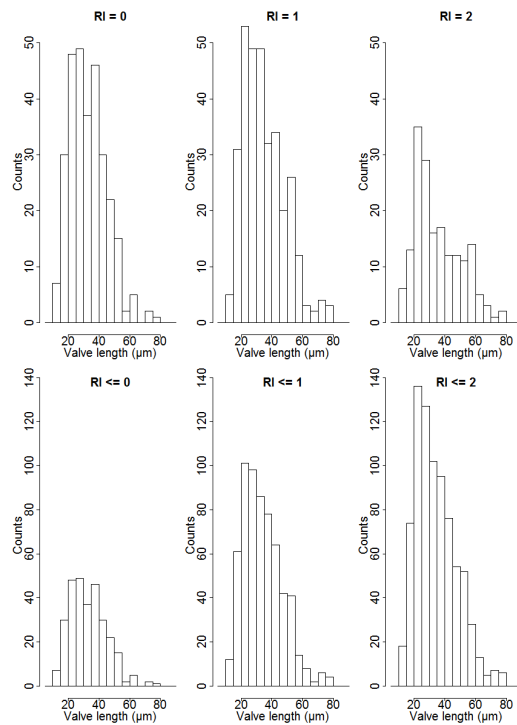

**Slide: 54S-800m.2002-03.Cup18.500µl.63x.ori, max. RI = 2**

KS test whole population (n=592) vs. RI<=0 (n=238): p = 0.006 below 0.05  
 KS test whole population (n=592) vs. RI<=1 (n=513): p = 0.989

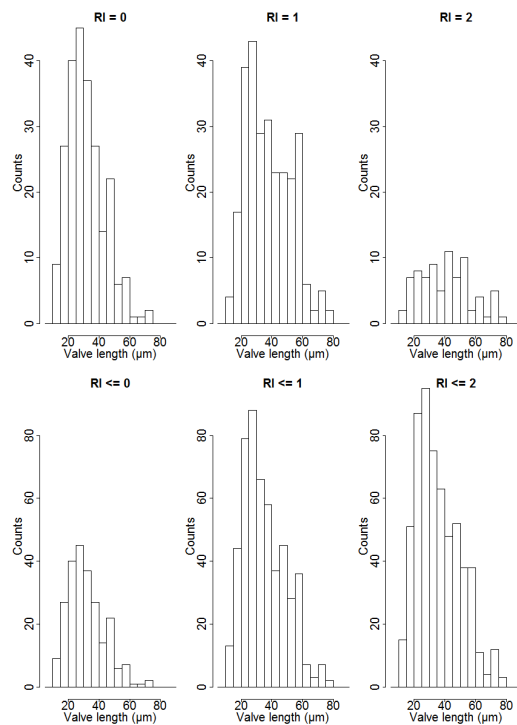

**Slide: 54S-800m.2002-03.Cup19.1ml.newSlide.63x.ori, max. RI = 2**

KS test whole population (n=955) vs. RI<=0 (n=273): p = 0 below 0.05  
 KS test whole population (n=955) vs. RI<=1 (n=677): p = 0.35

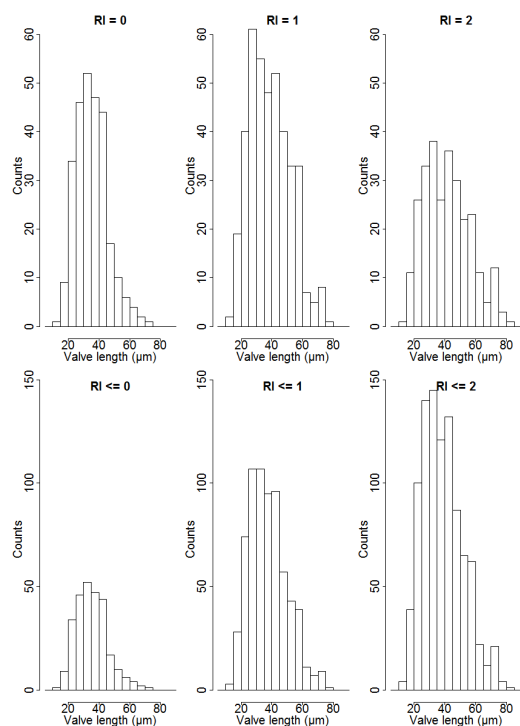

**Slide: 54S-800m.2002-03.Cup20.500μl.63x.ori, max. RI = 2**

KS test whole population (n=811) vs. RI<=0 (n=402): p = 0.001 below 0.05  
 KS test whole population (n=811) vs. RI<=1 (n=734): p = 1

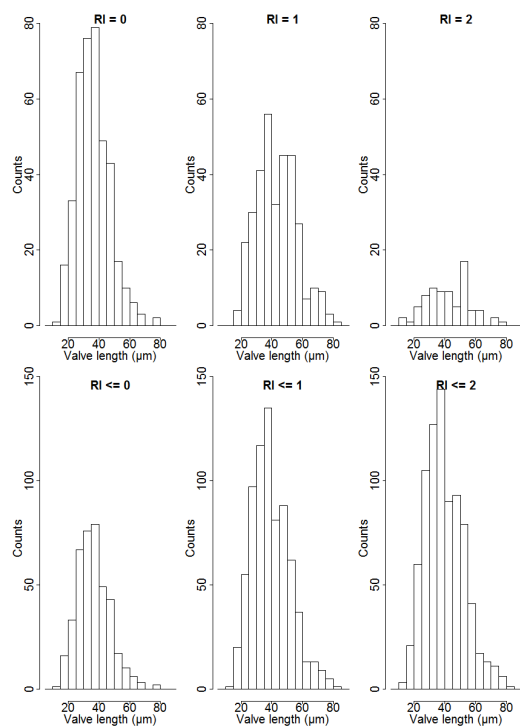

# Slide: 54S-800m.2003-04.Cup01.1ml.63x.ori, max. RI = 6

KS test whole population (n=160) vs. RI<=0 (n=15): p = 0.031 below 0.05  
 KS test whole population (n=160) vs. RI<=1 (n=49): p = 0.669  
 KS test whole population (n=160) vs. RI<=2 (n=74): p = 0.628  
 KS test whole population (n=160) vs. RI<=3 (n=96): p = 1  
 KS test whole population (n=160) vs. RI<=4 (n=123): p = 1  
 KS test whole population (n=160) vs. RI<=5 (n=142): p = 1

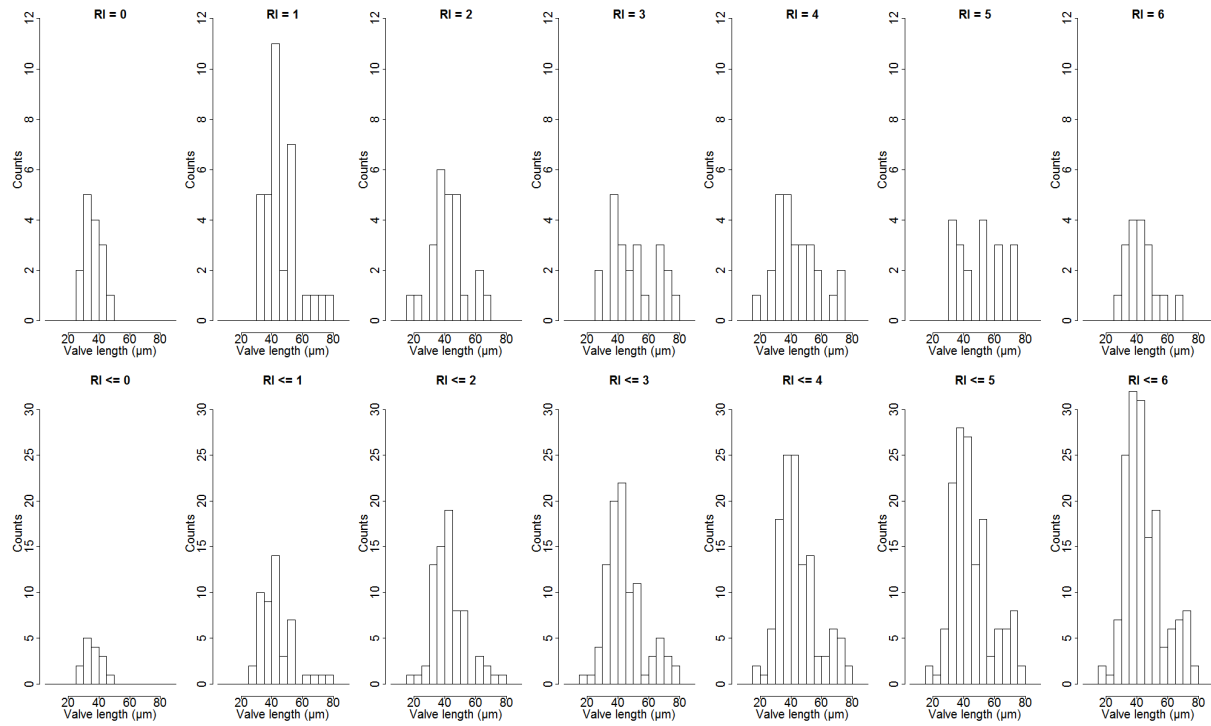

**Slide: 54S-800m.2003-04.Cup02.1ml.63x.ori, max. RI = 5**

KS test whole population (n=327) vs. RI<=0 (n=48): p = 0.007 below 0.05

KS test whole population (n=327) vs. RI<=1 (n=135): p = 0.359

KS test whole population (n=327) vs. RI<=2 (n=197): p = 1

KS test whole population (n=327) vs. RI<=3 (n=260): p = 1

KS test whole population (n=327) vs. RI<=4 (n=293): p = 1

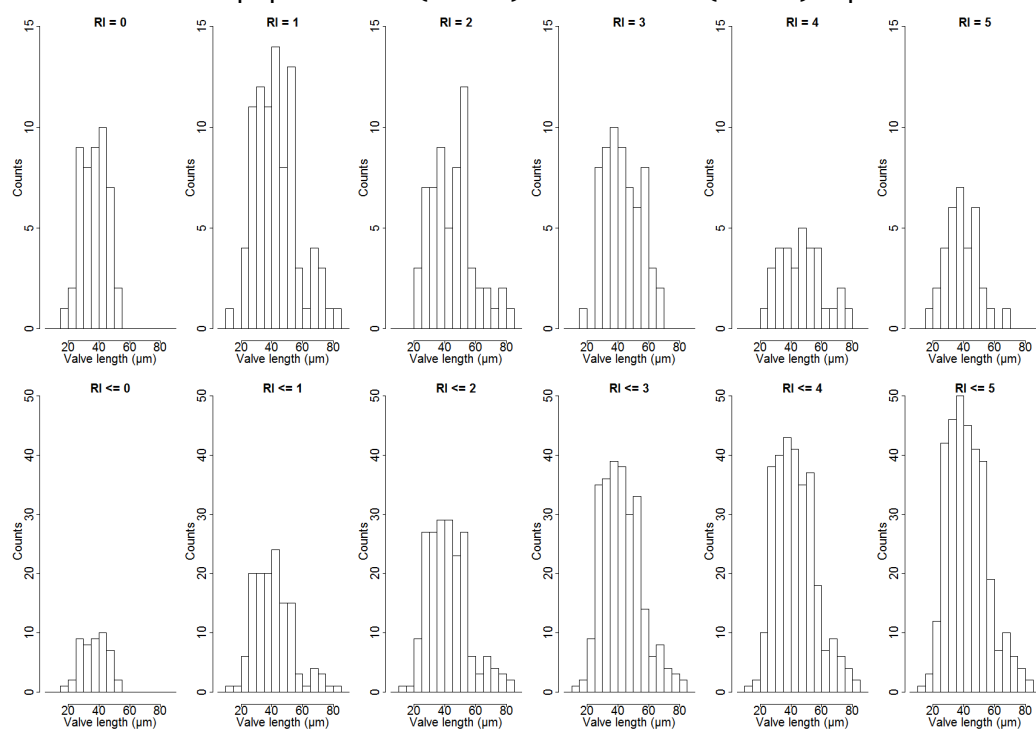

### Slide: 54S-800m.2003-04.Cup03.1ml.63x.ori, max. RI = 5

KS test whole population (n=430) vs. RI<=0 (n=78): p = 0.003 below 0.05  
 KS test whole population (n=430) vs. RI<=1 (n=216): p = 0.364  
 KS test whole population (n=430) vs. RI<=2 (n=304): p = 0.983  
 KS test whole population (n=430) vs. RI<=3 (n=367): p = 1  
 KS test whole population (n=430) vs. RI<=4 (n=411): p = 1

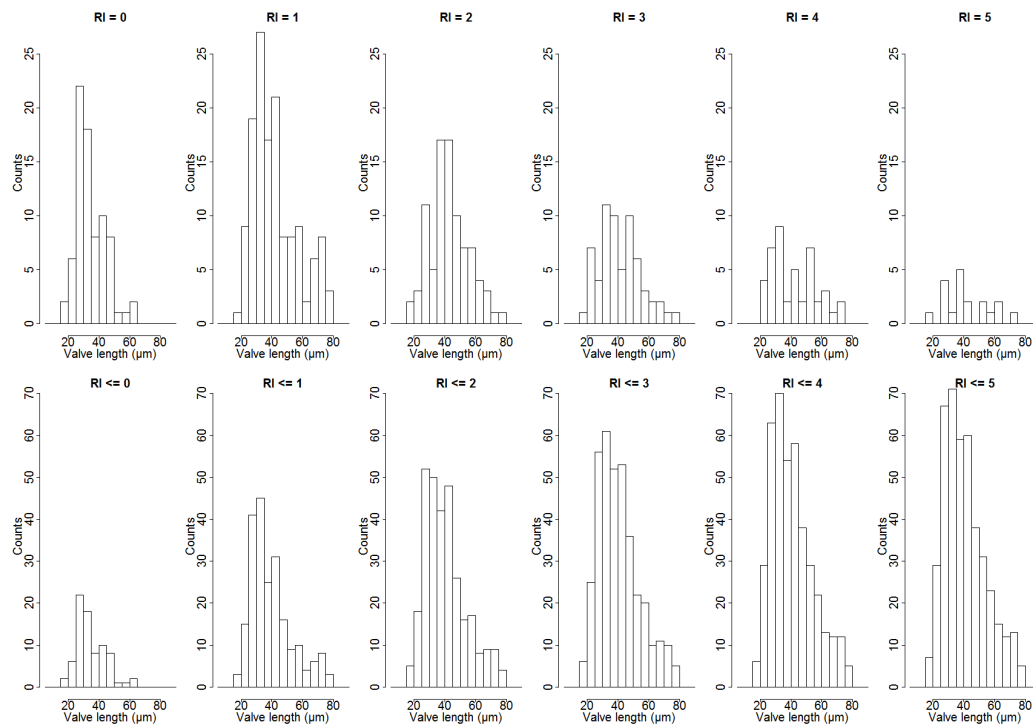

### Slide: 54S-800m.2003-04.Cup04.1ml.63x.ori, max. RI = 2

KS test whole population (n=600) vs. RI<=0 (n=118): p = 0.011 below 0.05  
 KS test whole population (n=600) vs. RI<=1 (n=370): p = 0.27

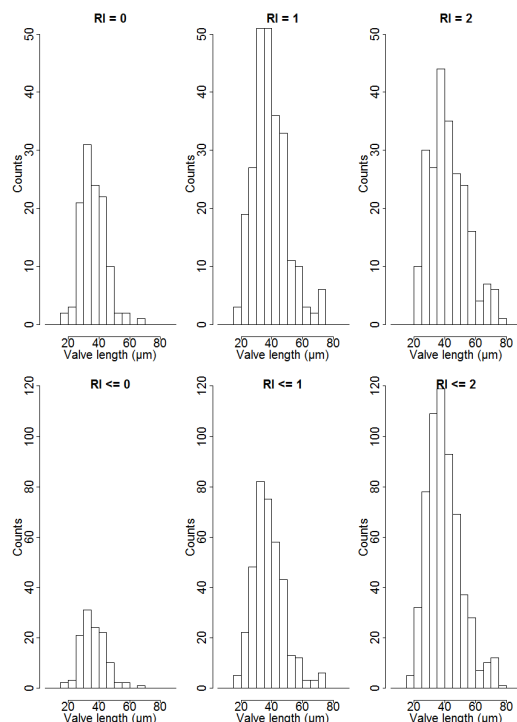

**Slide: 54S-800m.2003-04.Cup05.1ml.63x.ori, max. RI = 3**

KS test whole population (n=467) vs. RI<=0 (n=119): p = 0.029      below 0.05  
 KS test whole population (n=467) vs. RI<=1 (n=286): p = 0.808  
 KS test whole population (n=467) vs. RI<=2 (n=386): p = 1

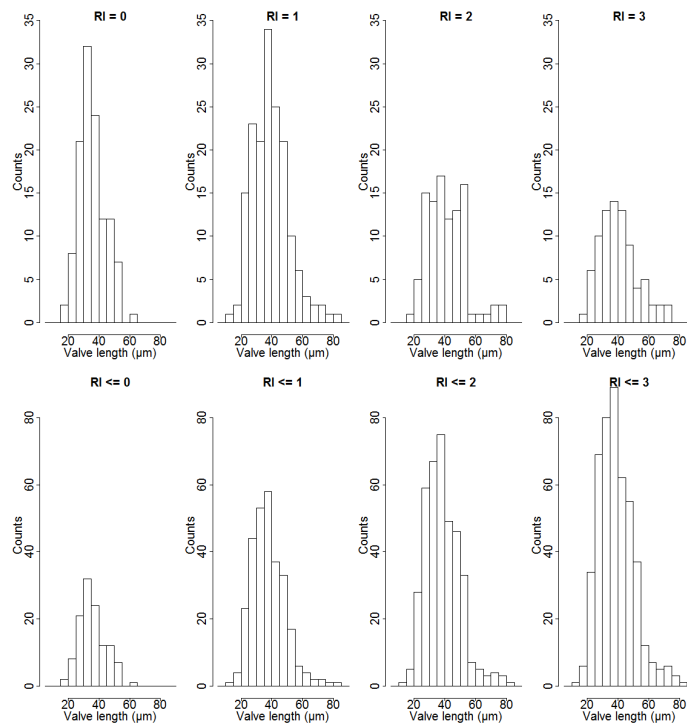

**Slide: 54S-800m.2003-04.Cup06.1ml.63x.ori, max. RI = 3**

KS test whole population (n=718) vs. RI<=0 (n=90): p = 0      below 0.05  
 KS test whole population (n=718) vs. RI<=1 (n=257): p = 0      below 0.05  
 KS test whole population (n=718) vs. RI<=2 (n=457): p = 0.428

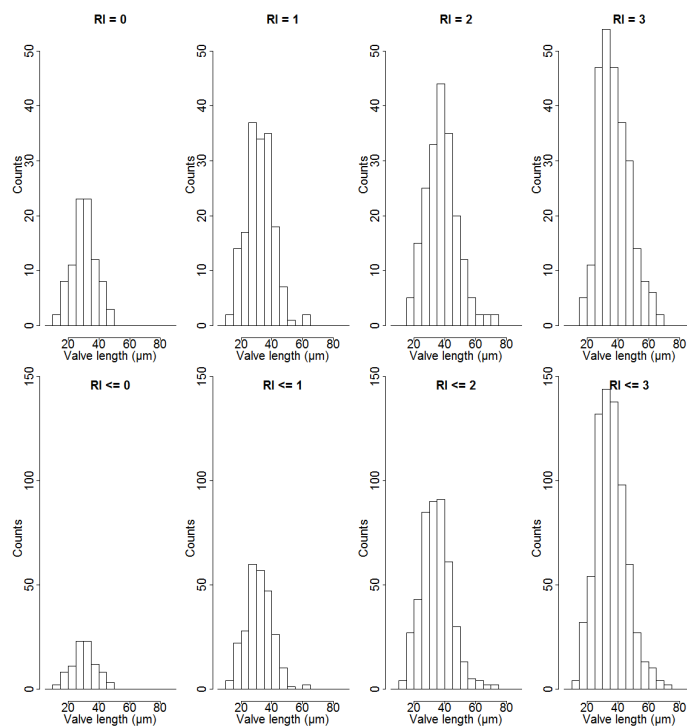



**Slide: 54S-800m.2003-04.Cup07.0.5ml.63x.ori, max. RI = 3**

KS test whole population (n=1639) vs. RI<=0 (n=364): p = 0 below 0.05  
 KS test whole population (n=1639) vs. RI<=1 (n=857): p = 0 below 0.05  
 KS test whole population (n=1639) vs. RI<=2 (n=1242): p = 0.304

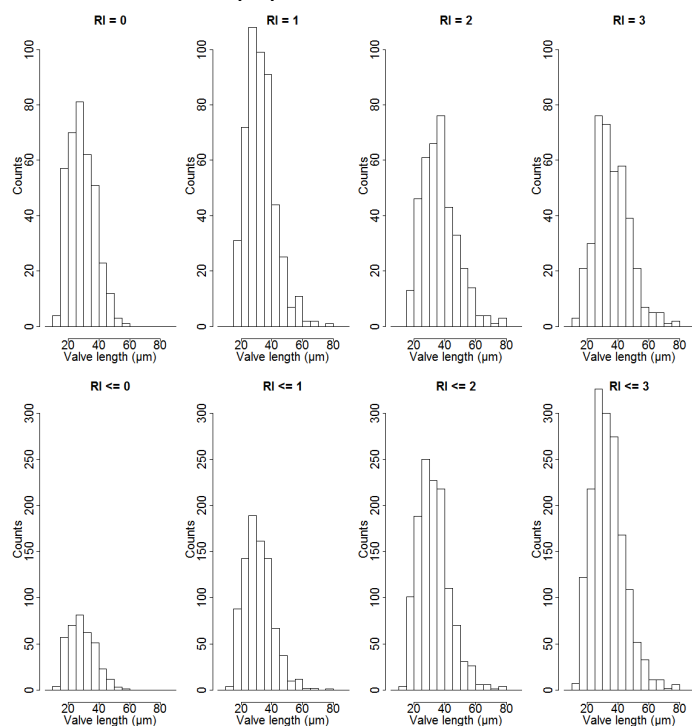

**Slide: 54S-800m.2003-04.Cup08.0.2ml.63x.ori, max. RI = 2**

KS test whole population (n=1360) vs. RI<=0 (n=528): p = 0 below 0.05  
 KS test whole population (n=1360) vs. RI<=1 (n=1091): p = 0.436

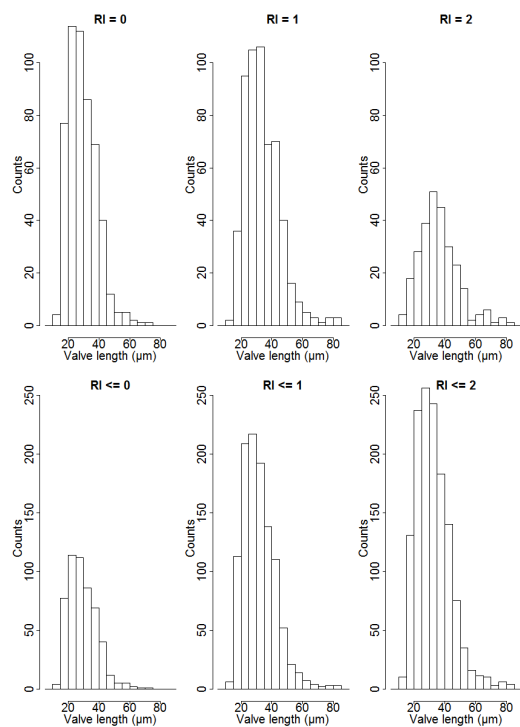

**Slide: 54S-800m.2003-04.Cup09.0.2ml.63x.ori, max. RI = 2**

KS test whole population (n=1228) vs. RI≤0 (n=540): p = 0.002 below 0.05  
 KS test whole population (n=1228) vs. RI≤1 (n=1049): p = 0.801

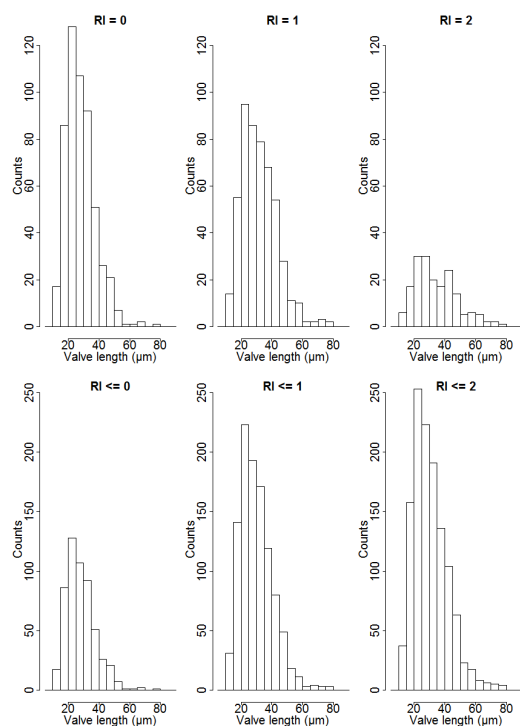

**Slide: 54S-800m.2003-04.Cup10.0.5ml.63x.ori, max. RI = 2**

KS test whole population (n=1345) vs. RI≤0 (n=475): p = 0.005 below 0.05  
 KS test whole population (n=1345) vs. RI≤1 (n=994): p = 0.811

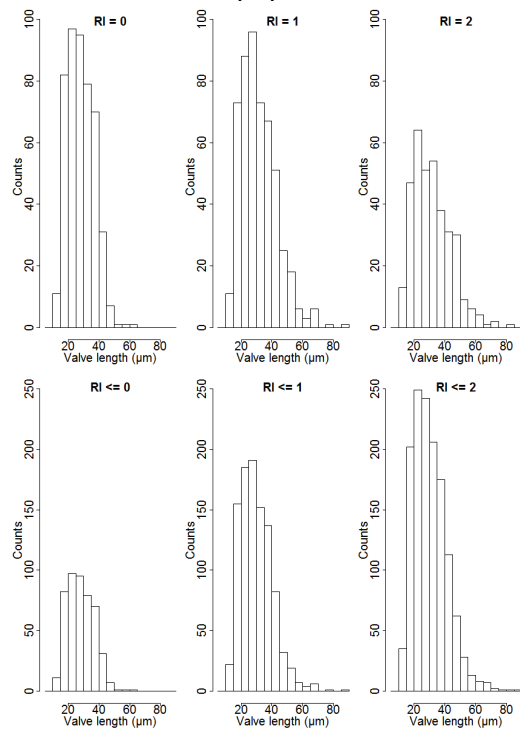

### Slide: 54S-800m.2003-04.Cup11.1ml.63x.ori, max. RI = 6

KS test whole population (n=553) vs. RI<=0 (n=175): p = 0 below 0.05  
 KS test whole population (n=553) vs. RI<=1 (n=351): p = 0.427  
 KS test whole population (n=553) vs. RI<=2 (n=447): p = 1  
 KS test whole population (n=553) vs. RI<=3 (n=500): p = 1  
 KS test whole population (n=553) vs. RI<=4 (n=525): p = 1  
 KS test whole population (n=553) vs. RI<=5 (n=536): p = 1

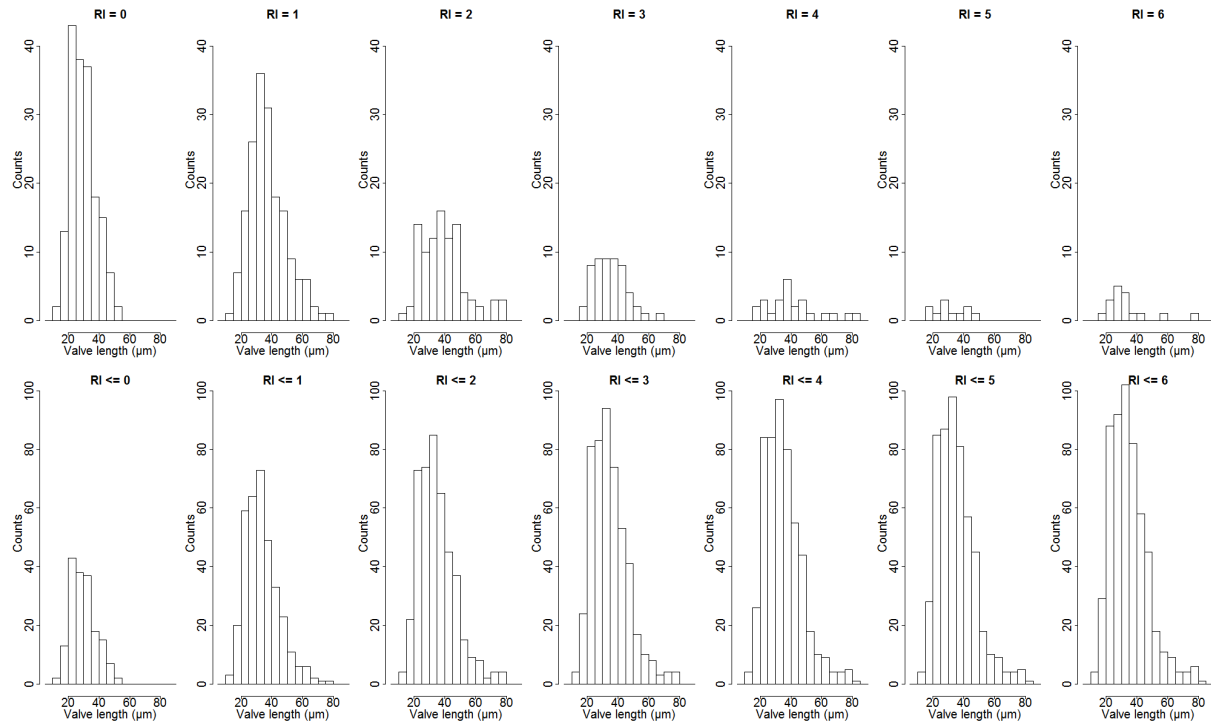

### Slide: 54S-800m.2003-04.Cup12.1ml.63x.ori, max. RI = 2

KS test whole population (n=689) vs. RI<=0 (n=181): p = 0.067  
 KS test whole population (n=689) vs. RI<=1 (n=489): p = 0.744

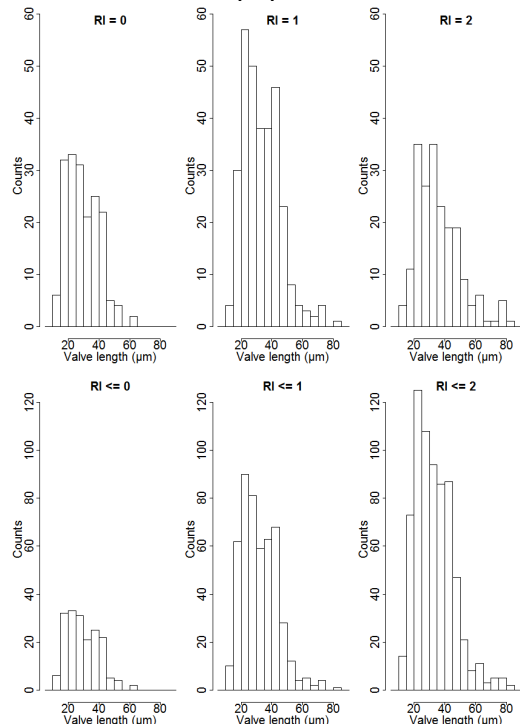

**Slide: 54S-800m.2003-04.Cup13.1ml.63x.ori, max. RI = 2**

KS test whole population (n=1377) vs. RI≤0 (n=405): p = 0.002 below 0.05  
 KS test whole population (n=1377) vs. RI≤1 (n=976): p = 0.582

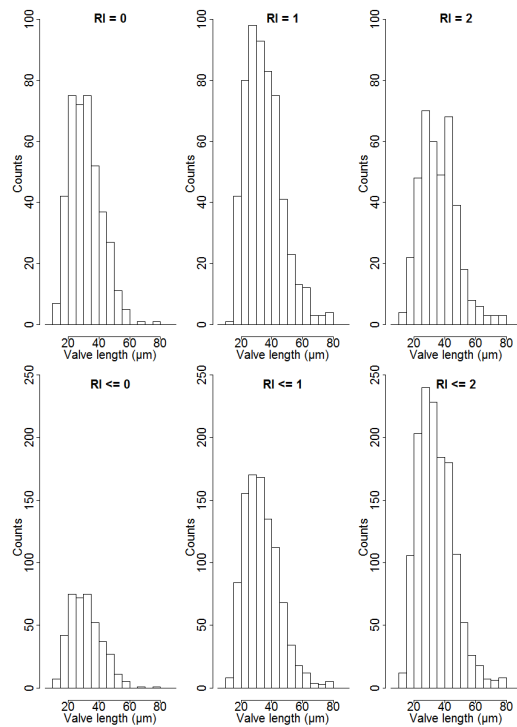

**Slide: 54S-800m.2003-04.Cup14.1ml.63x.ori, max. RI = 5**

KS test whole population (n=1525) vs. RI≤0 (n=250): p = 0 below 0.05  
 KS test whole population (n=1525) vs. RI≤1 (n=647): p = 0.11  
 KS test whole population (n=1525) vs. RI≤2 (n=950): p = 0.979  
 KS test whole population (n=1525) vs. RI≤3 (n=1205): p = 1  
 KS test whole population (n=1525) vs. RI≤4 (n=1397): p = 1

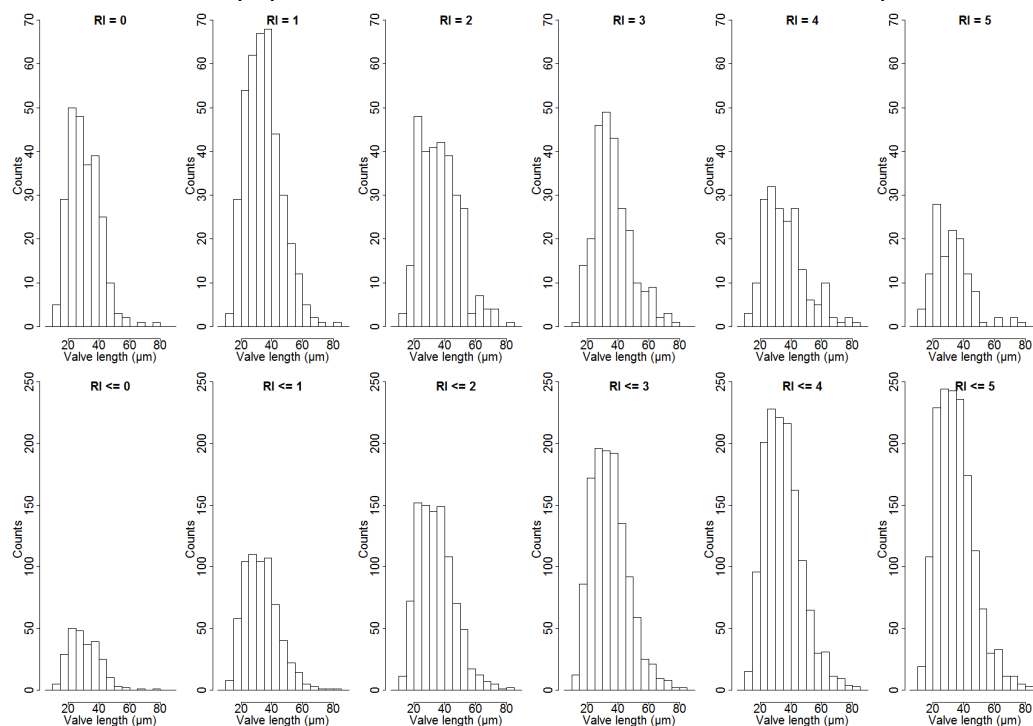

**Slide: 54S-800m.2003-04.Cup15.4ml.63x.ori, max. RI = 2**

KS test whole population (n=673) vs. RI<=0 (n=159): p = 0.336  
 KS test whole population (n=673) vs. RI<=1 (n=451): p = 0.937

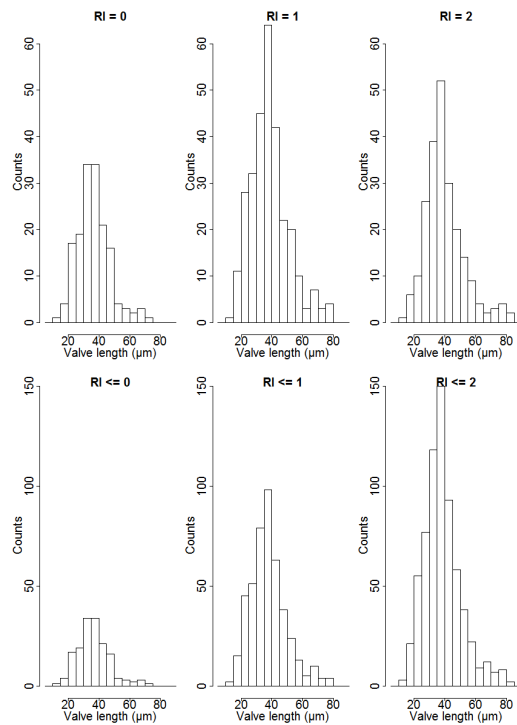

**Slide: 54S-800m.2003-04.Cup16.4ml.63x.ori, max. RI = 2**

KS test whole population (n=473) vs. RI<=0 (n=144): p = 0.011 below 0.05  
 KS test whole population (n=473) vs. RI<=1 (n=343): p = 0.978

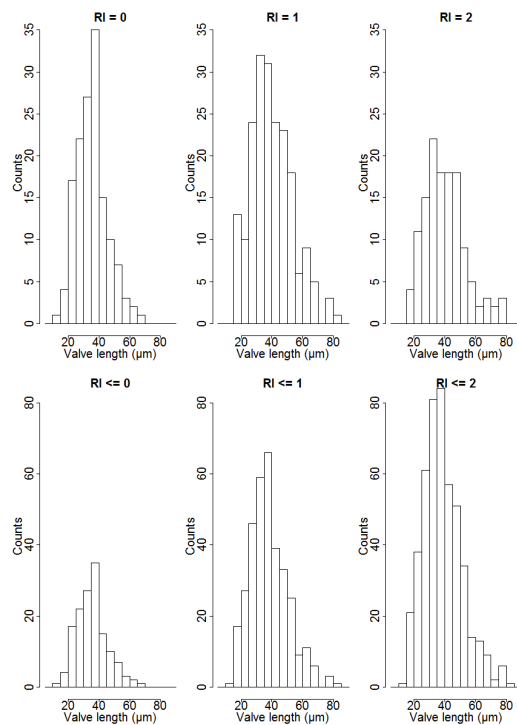

**Slide: 54S-800m.2003-04.Cup17.1ml.63x.ori, max. RI = 2**

KS test whole population (n=840) vs. RI≤0 (n=217): p = 0 below 0.05  
 KS test whole population (n=840) vs. RI≤1 (n=540): p = 0.489

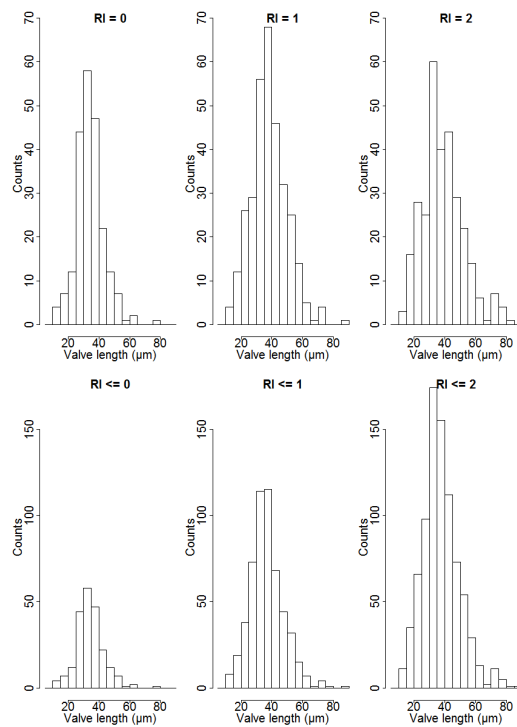

**Slide: 54S-800m.2003-04.Cup18.1ml.63x.ori, max. RI = 2**

KS test whole population (n=998) vs. RI≤0 (n=231): p = 0.065  
 KS test whole population (n=998) vs. RI≤1 (n=653): p = 0.808

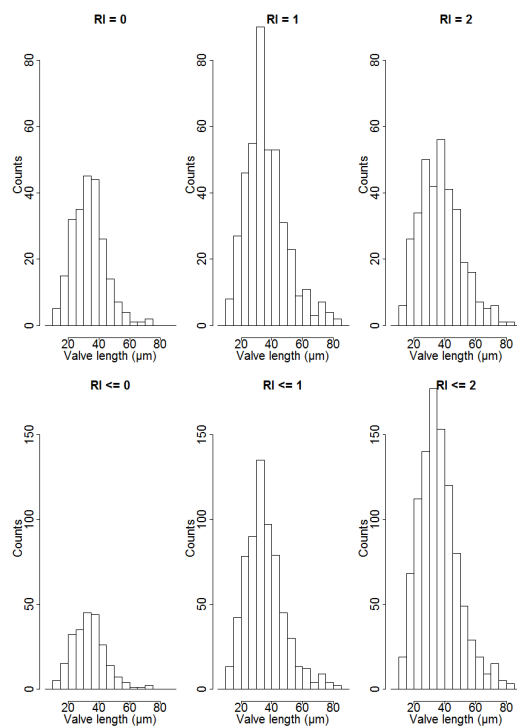

**Slide: 54S-800m.2003-04.Cup19.2ml.63x.ori, max. RI = 2**

KS test whole population (n=559) vs. RI<=0 (n=148): p = 0.052  
 KS test whole population (n=559) vs. RI<=1 (n=396): p = 0.929

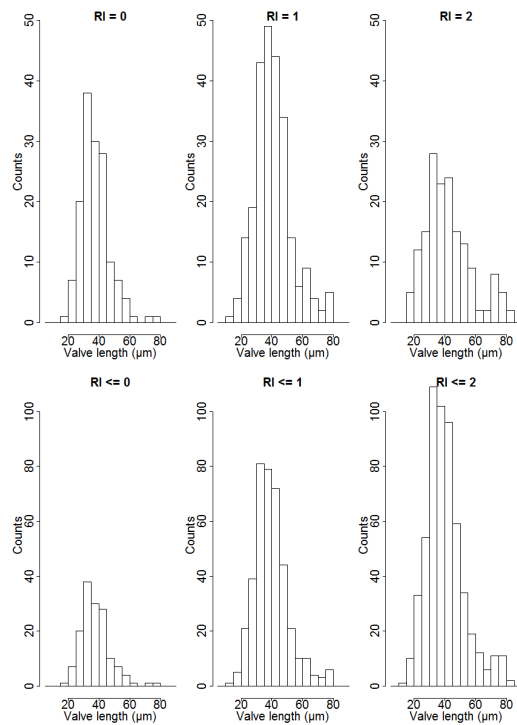

**Slide: 54S-800m.2003-04.Cup20.4ml.63x.ori, max. RI = 3**

KS test whole population (n=460) vs. RI<=0 (n=68): p = 0.31  
 KS test whole population (n=460) vs. RI<=1 (n=203): p = 0.926  
 KS test whole population (n=460) vs. RI<=2 (n=322): p = 1

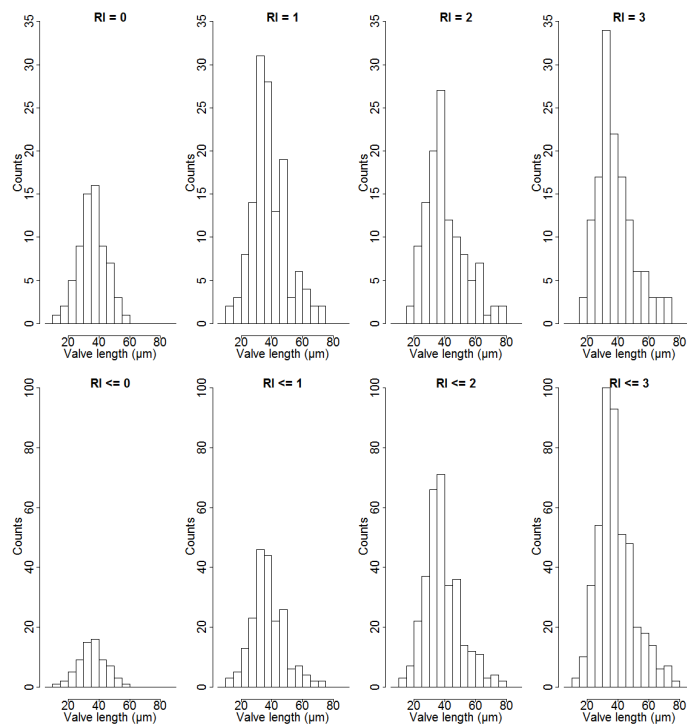

**Slide: 54S-800m.2003-04.Cup21.6ml.63x.ori, max. RI = 4**

KS test whole population (n=210) vs. RI<=0 (n=31): p = 0.006 below 0.05

KS test whole population (n=210) vs. RI<=1 (n=89): p = 0.297

KS test whole population (n=210) vs. RI<=2 (n=127): p = 0.799

KS test whole population (n=210) vs. RI<=3 (n=164): p = 0.957

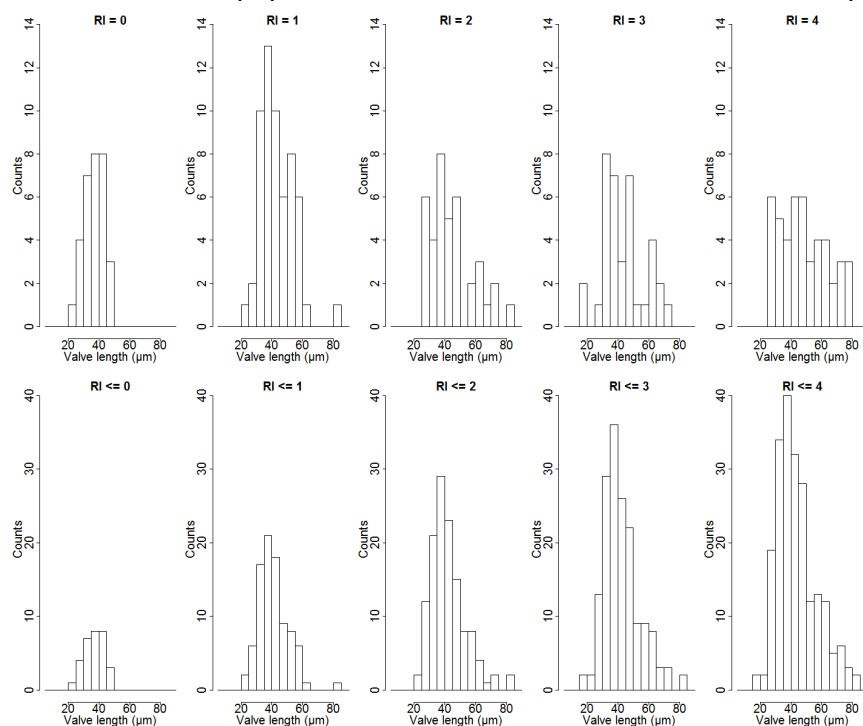

Supplement: Supplementary file 1 [file 1]
