# Supplementary material
Source: publisher figshare collection journal article supplement (https://tandf.figshare.com/articles/dataset/_/9678005)
Supplement: Supplementary file 2 [file 1]

# 1 Supplements

This document supplements the paper “Temporal changes in size distributions of the Southern Ocean diatom *Fragilariopsis kerguelensis* through high-throughput microscopy of sediment trap samples” by Michael Kloster, Andrés S. Rigual-Hernández, Leanne K. Armand, Gerhard Kauer, Thomas W. Trull & Bábk Beszteri. Diatom Research, DOI: 10.1080/0269249X.2019.1626770.

## 1.1 Data

The raw data (morphometric measurements as well as the underlying light-microscopic images) are provided at PANGAEA (<https://doi.pangaea.de/10.1594/PANGAEA.904325>).

## 1.2 SHERPA settings

The configuration files are provided at PANGAEA. Settings for the low resolution scan can be found in “54S-800m.20x.dmini”, for the high resolution scan in “54S-800m.63x.dmini”

## 1.3 Modified SHERPA procedure

We adapted our established analysis workflow to compensate for the low imaging contrast of the mounted valves: Increased manual intervention was exerted for manual post-editing, as well as reviewing segmentation results by also addressing results of lower quality than described in (Kloster et al. 2017). “Quality” in this context relates to the question if a) an object is of interest, and b) the image processing and segmentation worked out well. SHERPA supports the user in tackling this problem by calculating the “ranking index” (RI), which increases with declining result quality.

Accordingly, for each slide, when selecting valves of interest in the low-resolution (20x magnification) scans, results from RIs of 0 to 6, respectively for sparse samples up to RI 10, were reviewed. If ca. 100 consecutive results of one particular RI did not represent suitable *F. kerguelensis* valves, the remaining results of this RI were skipped, because the probability that they contained further useful *F. kerguelensis* valve images was very low, and the procedure was resumed with results of the following RI. From the high-resolution scans (63x magnification), for each slide results were reviewed, reworked as needed, and *F. kerguelensis* valves selected for RIs 0 to at least 2. If the sample size was not sufficient (mostly below 300), results of higher RIs were added. The same applied if results of the highest RI changed the valve length distribution significantly, which was checked by a Kolmogorov-Smirnov test (see supplement “KS test results regarding RI”). In some cases, duplicate slides were scanned, to obtain higher sampling sizes.

Costae distance measurement is an experimental SHERPA feature and, until now, was tested on *Fragilariopsis* valves only (Beszteri et al. 2018). This frequency based method is mostly robust towards segmentation flaws, nevertheless results of costae distance  $\geq 5 \mu\text{m}$  were assumed to be incorrect and thus rejected, which applied to ca. 0.5 % of all data. The valve image was segmented by Adaptive Thresholding (Bradski & Kaehler 2008), resulting in costae resp. valve border colored white and striae resp. image background colored black. The segmented image was sampled along the central 80 % of the valve’s major (apical) axis by the Bresenham algorithm (Bresenham 1965). Along this sampled line, each white section was replaced by a 5 pixel wide binomial-smoothed peak, resulting in an artificial 2d-image of costae positions. This was transformed into the frequency domain by discrete Fourier transform (DFT). Average costae distance was calculated from the frequency of the maximum magnitude of the Fourier transformed.

#### 1.4 Valves within the initial cell size range

**Table S1.** Abundance, percentage and relative frequency of valves within the initial cell size range

| Cup  | Sample size <sup>*1</sup> | n of valves within the initial cell size range ( $\geq 75.5 \mu\text{m}$ valve length) <sup>*1</sup> | % of valves within the initial cell size range ( $\geq 75.5 \mu\text{m}$ valve length) <sup>*1</sup> | Rel. frequency of valves within the initial cell size range (RFI) <sup>*2</sup> |
|------|---------------------------|------------------------------------------------------------------------------------------------------|------------------------------------------------------------------------------------------------------|---------------------------------------------------------------------------------|
| 1.01 | 300                       | 2                                                                                                    | 0.67                                                                                                 | 0.06                                                                            |
| 1.02 | 569                       | 1                                                                                                    | 0.18                                                                                                 | 0.03                                                                            |
| 1.03 | 525                       | 1                                                                                                    | 0.19                                                                                                 | 0.04                                                                            |
| 1.04 | 178                       | 0                                                                                                    | 0.00                                                                                                 | 0.00                                                                            |
| 1.05 | 455                       | 0                                                                                                    | 0.00                                                                                                 | 0.07                                                                            |
| 1.06 | 1630                      | 1                                                                                                    | 0.06                                                                                                 | 0.02                                                                            |
| 1.07 | 574                       | 1                                                                                                    | 0.17                                                                                                 | 0.14                                                                            |
| 1.08 | 736                       | 1                                                                                                    | 0.14                                                                                                 | 0.02                                                                            |
| 1.09 | 1010                      | 3                                                                                                    | 0.30                                                                                                 | 0.04                                                                            |
| 1.10 | 907                       | 1                                                                                                    | 0.11                                                                                                 | 0.03                                                                            |
| 1.11 | 338                       | 0                                                                                                    | 0.00                                                                                                 | 0.00                                                                            |
| 1.11 | 338                       | 0                                                                                                    | 0.00                                                                                                 | 0.00                                                                            |
| 1.12 | 409                       | 0                                                                                                    | 0.00                                                                                                 | 0.00                                                                            |
| 1.13 | 478                       | 2                                                                                                    | 0.42                                                                                                 | 0.02                                                                            |
| 1.13 | 478                       | 2                                                                                                    | 0.42                                                                                                 | 0.00                                                                            |
| 1.14 | 420                       | 0                                                                                                    | 0.00                                                                                                 | 0.03                                                                            |
| 1.15 | 379                       | 2                                                                                                    | 0.53                                                                                                 | 0.05                                                                            |
| 1.16 | 145                       | 0                                                                                                    | 0.00                                                                                                 | 0.00                                                                            |
| 1.17 | 793                       | 5                                                                                                    | 0.63                                                                                                 | 0.12                                                                            |
| 1.18 | 592                       | 3                                                                                                    | 0.51                                                                                                 | 0.18                                                                            |
| 1.19 | 955                       | 4                                                                                                    | 0.42                                                                                                 | 0.15                                                                            |
| 1.20 | 811                       | 4                                                                                                    | 0.49                                                                                                 | 0.28                                                                            |
| 2.01 | 160                       | 2                                                                                                    | 1.25                                                                                                 | 0.14                                                                            |
| 2.02 | 327                       | 5                                                                                                    | 1.53                                                                                                 | 0.18                                                                            |
| 2.03 | 430                       | 5                                                                                                    | 1.16                                                                                                 | 0.04                                                                            |
| 2.04 | 600                       | 0                                                                                                    | 0.00                                                                                                 | 0.01                                                                            |
| 2.05 | 467                       | 4                                                                                                    | 0.86                                                                                                 | 0.09                                                                            |
| 2.06 | 718                       | 0                                                                                                    | 0.00                                                                                                 | 0.03                                                                            |
| 2.07 | 1639                      | 5                                                                                                    | 0.31                                                                                                 | 0.40                                                                            |

|      |      |    |      |      |
|------|------|----|------|------|
| 2.08 | 1360 | 9  | 0.66 | 0.19 |
| 2.09 | 1228 | 4  | 0.33 | 0.18 |
| 2.10 | 1345 | 3  | 0.22 | 0.16 |
| 2.11 | 553  | 7  | 1.27 | 0.11 |
| 2.12 | 689  | 7  | 1.02 | 0.14 |
| 2.13 | 1377 | 7  | 0.51 | 0.10 |
| 2.14 | 1525 | 8  | 0.52 | 0.06 |
| 2.15 | 673  | 9  | 1.34 | 0.23 |
| 2.16 | 473  | 6  | 1.27 | 0.10 |
| 2.17 | 840  | 6  | 0.71 | 0.19 |
| 2.18 | 998  | 7  | 0.70 | 0.13 |
| 2.19 | 559  | 13 | 2.33 | 0.09 |
| 2.20 | 460  | 2  | 0.43 | 0.05 |
| 2.21 | 210  | 3  | 1.43 | 0.04 |

\*1) These values originate from the count performed during the morphometric analysis

\*2) These values originate from the additional analysis for finding cells within the initial cell size range only

RFI is calculated according to Eq. 1

## 1.5 R scripts

The R scripts used for analyzing the data are provided in PANGAEA (<https://doi.pangaea.de/10.1594/PANGAEA.902769>).

## 1.6 Detail on valve lengths

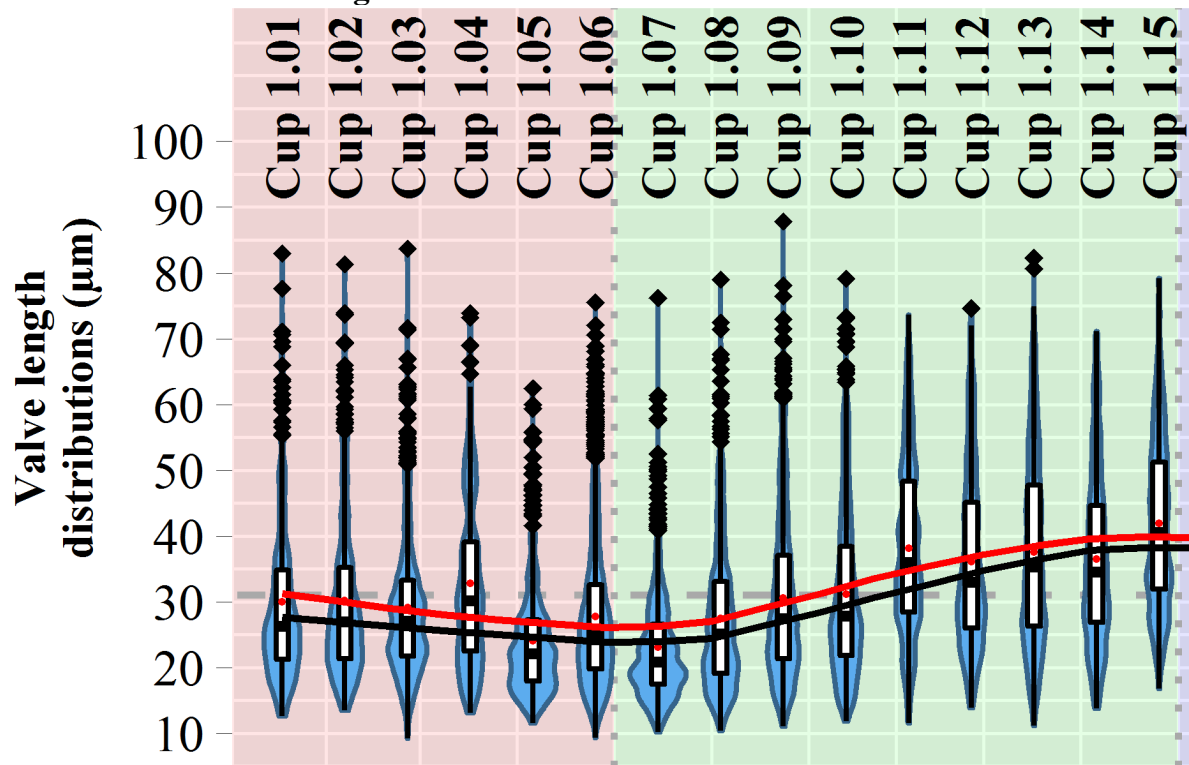

**Fig. S1.** Temporal variability of valve length distributions showing the ongoing loss of short valves during phase 2 of sampling year 2002/03 (detail from Fig. 4 c). Blue violin plots depict the valve length distributions, box plots represent quartiles, red dots indicate the mean, black dots inside the boxplots the median, red and black lines the respective trend lines derived by LOESS smoothing. The dashed line depicts 31  $\mu\text{m}$ , the size limit below which sexual reproduction can occur. Phase 1 is highlighted by red, phase 2 by green background.

## 1.7 Additional measurements

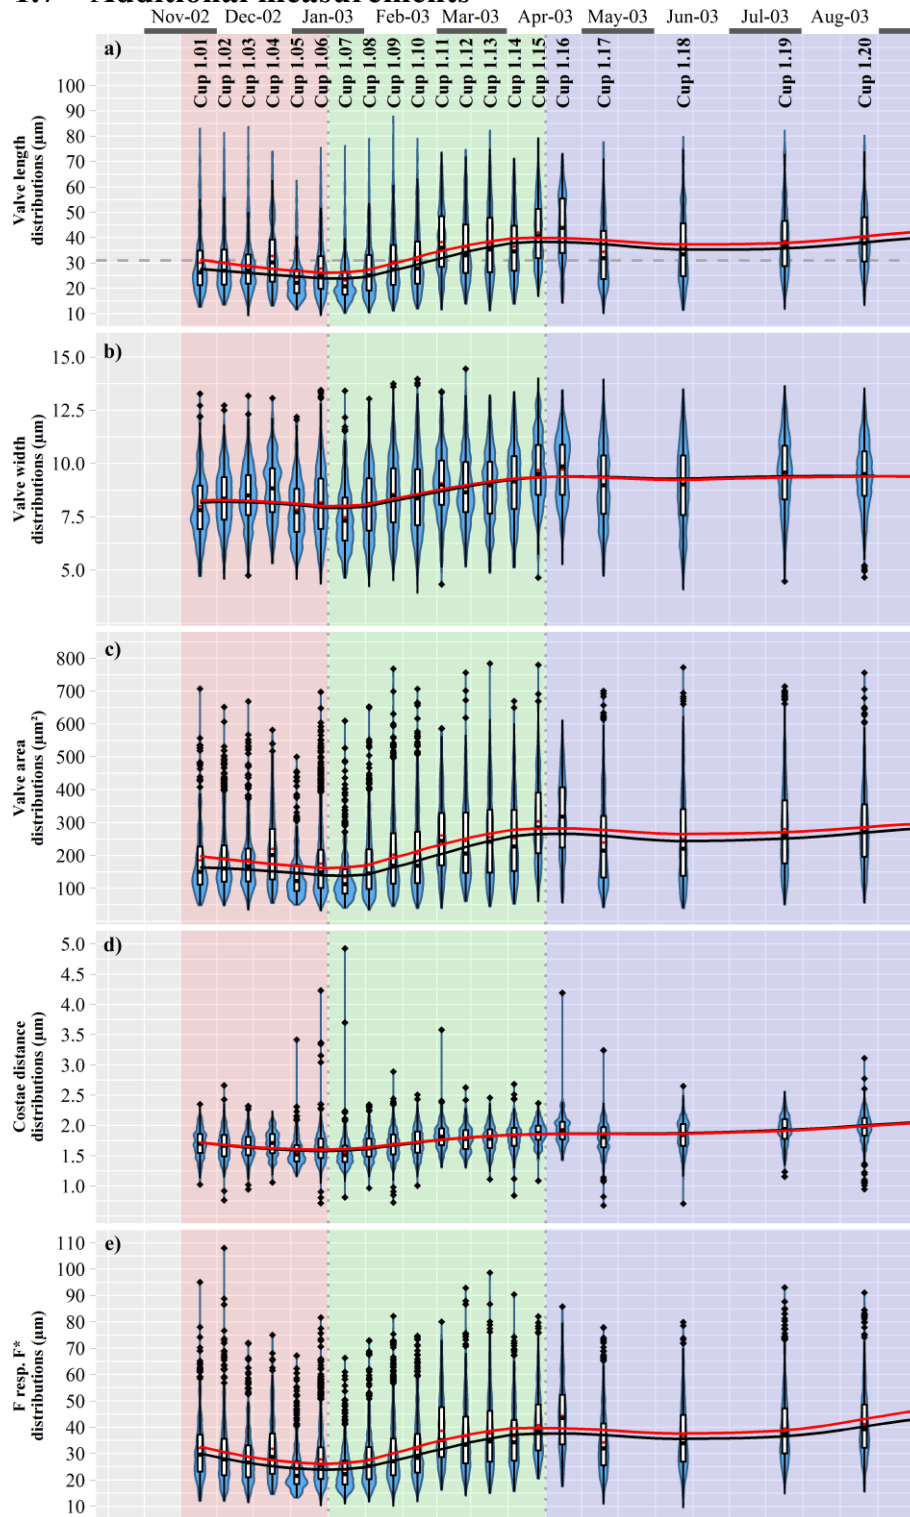

**Fig. S2.** Season 2002/03, distribution of a) valve length (cmp. Figs 4–5 c), b) valve width (transapical), c) valve area, d) costae distance, e) F (Fenner et al. 1976) respectively F\* (Cortese & Gersonde 2007). To compensate for outliers, results for d) and e) with costae distances  $\geq 5 \mu\text{m}$  were excluded.

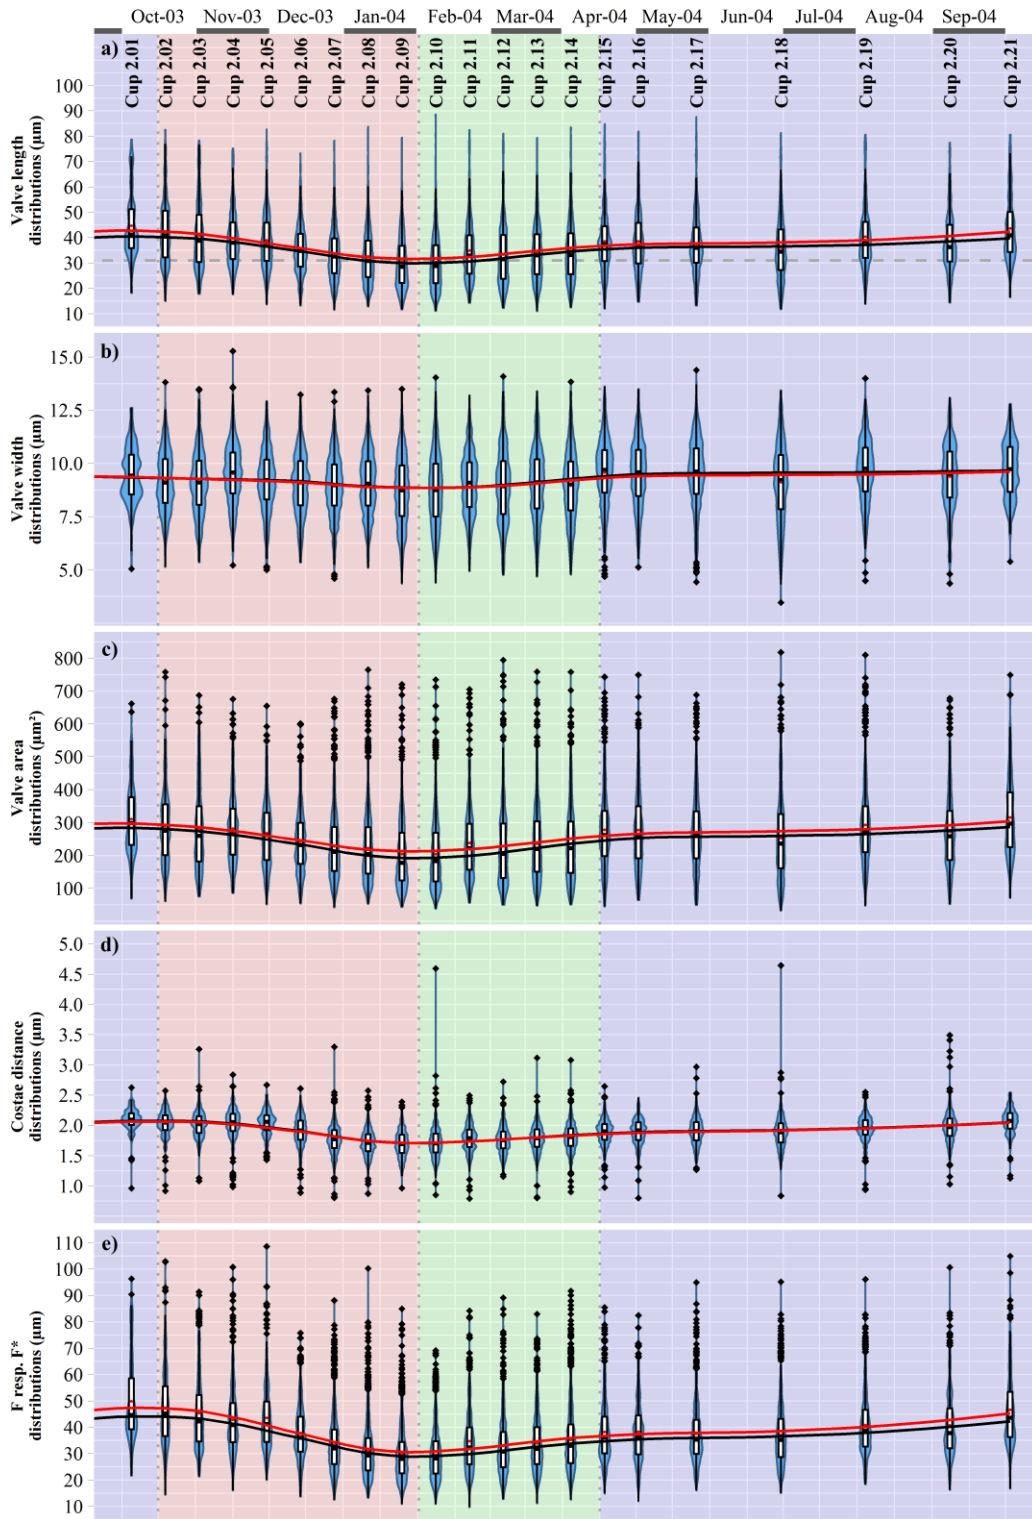

**Fig. S3.** Season 2003/04, distribution of a) valve length (cmp. Figs 4–5 c), b) valve width (transapical), c) valve area, d) costae distance, e) F (Fenner et al. 1976) respectively F\* (Cortese & Gersonde 2007). To compensate for outliers, results for d) and e) with costae distances  $\geq 5 \mu\text{m}$  were excluded.

## 1.8 Chlorophyll-a data

**Table S2.** Chlorophyll-*a* concentration derived from NASA's Giovanni online data system. NA = not available.

| Date       | Chlorophyll- <i>a</i><br>concentration<br>(mg · m <sup>-3</sup> ) |
|------------|-------------------------------------------------------------------|
| 2002-08-16 | 0.138                                                             |
| 2002-09-16 | 0.142                                                             |
| 2002-10-16 | 0.153                                                             |
| 2002-11-16 | 0.18                                                              |
| 2002-12-16 | 0.182                                                             |
| 2003-01-16 | 0.164                                                             |
| 2003-02-15 | 0.255                                                             |
| 2003-03-16 | 0.149                                                             |
| 2003-04-16 | 0.119                                                             |
| 2003-05-16 | 0.144                                                             |
| 2003-06-16 | NA                                                                |
| 2003-07-16 | NA                                                                |
| 2003-08-16 | 0.125                                                             |
| 2003-09-16 | 0.141                                                             |
| 2003-10-16 | 0.167                                                             |
| 2003-11-16 | 0.223                                                             |
| 2003-12-16 | 0.179                                                             |
| 2004-01-16 | 0.175                                                             |
| 2004-02-15 | 0.114                                                             |
| 2004-03-16 | 0.118                                                             |
| 2004-04-16 | 0.118                                                             |
| 2004-05-16 | 0.101                                                             |
| 2004-06-16 | NA                                                                |
| 2004-07-16 | NA                                                                |
| 2004-08-16 | 0.111                                                             |
| 2004-09-16 | 0.145                                                             |
| 2004-10-16 | 0.162                                                             |

## 1.9 Summary statistics of *F. kerguelensis* valve size distributions.

**Table S3.** Statistics of valve length measurements (compare Figs 4–5).

| Cup  | Middle day of sampling period | Length of sampling period (d) | Sample size | Valve length |             |               |          |          | % within sexually inducible size range <sup>*1</sup> | Rel. frequency of valves within the initial cell size range (RFI) <sup>*2</sup> |
|------|-------------------------------|-------------------------------|-------------|--------------|-------------|---------------|----------|----------|------------------------------------------------------|---------------------------------------------------------------------------------|
|      |                               |                               |             | Mean (μm)    | Median (μm) | Skewness (μm) | Min (μm) | Max (μm) |                                                      |                                                                                 |
| 1.01 | 2002-11-23                    | 10                            | 300         | 30.0         | 26.3        | 1.4           | 13.0     | 70.7     | 66.7                                                 | 0.06                                                                            |
| 1.02 | 2002-12-03                    | 10                            | 569         | 30.2         | 27.0        | 1.3           | 14.0     | 69.3     | 66.1                                                 | 0.03                                                                            |
| 1.03 | 2002-12-13                    | 10                            | 525         | 29.1         | 27.0        | 1.4           | 13.1     | 63.0     | 68.0                                                 | 0.04                                                                            |
| 1.04 | 2002-12-23                    | 10                            | 178         | 32.8         | 30.2        | 0.9           | 14.4     | 70.0     | 53.9                                                 | 0.00                                                                            |
| 1.05 | 2003-01-02                    | 10                            | 455         | 24.1         | 22.1        | 1.6           | 12.7     | 54.6     | 85.1                                                 | 0.07                                                                            |
| 1.06 | 2003-01-12                    | 10                            | 1630        | 27.7         | 25.3        | 1.2           | 11.9     | 61.6     | 70.9                                                 | 0.02                                                                            |
| 1.07 | 2003-01-22                    | 10                            | 574         | 23.1         | 20.8        | 1.8           | 11.4     | 53.9     | 86.6                                                 | 0.14                                                                            |
| 1.08 | 2003-02-01                    | 10                            | 736         | 27.5         | 25.1        | 1.2           | 12.0     | 62.8     | 69.4                                                 | 0.02                                                                            |
| 1.09 | 2003-02-11                    | 10                            | 1010        | 30.5         | 27.4        | 1.0           | 12.8     | 65.6     | 60.6                                                 | 0.04                                                                            |
| 1.10 | 2003-02-21                    | 10                            | 907         | 31.1         | 27.8        | 1.0           | 13.6     | 65.8     | 59.6                                                 | 0.03                                                                            |
| 1.11 | 2003-03-03                    | 10                            | 338         | 38.1         | 35.9        | 0.4           | 14.7     | 67.8     | 33.4                                                 | 0.00                                                                            |
| 1.12 | 2003-03-13                    | 10                            | 409         | 36.1         | 33.0        | 0.7           | 15.6     | 70.7     | 44.5                                                 | 0.00                                                                            |
| 1.13 | 2003-03-23                    | 10                            | 478         | 37.5         | 35.3        | 0.5           | 14.7     | 70.7     | 39.5                                                 | 0.02                                                                            |
| 1.14 | 2003-04-02                    | 10                            | 420         | 36.4         | 34.5        | 0.6           | 15.0     | 68.1     | 40.5                                                 | 0.03                                                                            |
| 1.15 | 2003-04-12                    | 10                            | 379         | 41.9         | 40.6        | 0.4           | 20.3     | 74.0     | 23.0                                                 | 0.05                                                                            |
| 1.16 | 2003-04-22                    | 10                            | 145         | 44.0         | 43.9        | -0.1          | 17.5     | 70.0     | 17.9                                                 | 0.00                                                                            |
| 1.17 | 2003-05-09                    | 25                            | 793         | 34.3         | 31.8        | 0.7           | 13.8     | 71.5     | 47.7                                                 | 0.12                                                                            |
| 1.18 | 2003-06-11                    | 40                            | 592         | 35.9         | 33.3        | 0.6           | 13.1     | 72.2     | 44.8                                                 | 0.18                                                                            |
| 1.19 | 2003-07-23                    | 45                            | 955         | 38.6         | 36.8        | 0.6           | 16.6     | 73.8     | 33.0                                                 | 0.15                                                                            |
| 1.20 | 2003-08-25                    | 20                            | 811         | 39.7         | 37.8        | 0.6           | 17.1     | 74.0     | 26.4                                                 | 0.28                                                                            |
| 2.01 | 2003-10-04                    | 14                            | 160         | 44.7         | 41.1        | 0.8           | 21.9     | 75.3     | 7.5                                                  | 0.14                                                                            |
| 2.02 | 2003-10-18                    | 14                            | 327         | 42.4         | 40.9        | 0.6           | 20.1     | 76.0     | 21.4                                                 | 0.18                                                                            |
| 2.03 | 2003-11-01                    | 14                            | 430         | 40.8         | 38.7        | 0.7           | 18.7     | 75.4     | 29.3                                                 | 0.04                                                                            |
| 2.04 | 2003-11-15                    | 14                            | 600         | 39.6         | 38.0        | 0.8           | 20.5     | 72.5     | 23.0                                                 | 0.01                                                                            |
| 2.05 | 2003-11-29                    | 14                            | 467         | 38.9         | 37.6        | 0.8           | 19.3     | 74.2     | 25.7                                                 | 0.09                                                                            |
| 2.06 | 2003-12-13                    | 14                            | 718         | 35.6         | 34.7        | 0.6           | 16.6     | 62.3     | 34.0                                                 | 0.03                                                                            |
| 2.07 | 2003-12-27                    | 14                            | 1639        | 33.6         | 32.5        | 0.8           | 15.8     | 66.2     | 44.9                                                 | 0.40                                                                            |
| 2.08 | 2004-01-10                    | 14                            | 1360        | 32.5         | 30.8        | 1.1           | 15.5     | 69.6     | 50.9                                                 | 0.19                                                                            |



|      |            |    |      |      |      |     |      |      |      |      |
|------|------------|----|------|------|------|-----|------|------|------|------|
| 2.09 | 2004-01-24 | 14 | 1228 | 30.5 | 28.5 | 1.0 | 13.6 | 66.5 | 58.7 | 0.18 |
| 2.10 | 2004-02-07 | 14 | 1345 | 30.3 | 28.8 | 0.9 | 13.3 | 62.5 | 57.3 | 0.16 |
| 2.11 | 2004-02-21 | 14 | 553  | 34.9 | 32.9 | 1.1 | 15.7 | 76.5 | 43.0 | 0.11 |
| 2.12 | 2004-03-06 | 14 | 689  | 33.3 | 31.5 | 1.0 | 13.7 | 74.9 | 48.2 | 0.14 |
| 2.13 | 2004-03-20 | 14 | 1377 | 34.1 | 33.0 | 0.8 | 15.1 | 69.3 | 44.0 | 0.10 |
| 2.14 | 2004-04-03 | 14 | 1525 | 34.7 | 33.1 | 0.8 | 14.7 | 72.1 | 42.8 | 0.06 |
| 2.15 | 2004-04-17 | 14 | 673  | 38.4 | 37.4 | 0.9 | 16.1 | 76.5 | 26.2 | 0.23 |
| 2.16 | 2004-05-01 | 14 | 473  | 38.5 | 36.9 | 0.7 | 15.7 | 76.3 | 29.6 | 0.10 |
| 2.17 | 2004-05-25 | 35 | 840  | 37.4 | 36.0 | 0.7 | 14.7 | 73.7 | 28.8 | 0.19 |
| 2.18 | 2004-06-29 | 35 | 998  | 36.0 | 34.4 | 0.8 | 13.8 | 74.1 | 37.0 | 0.13 |
| 2.19 | 2004-08-03 | 35 | 559  | 40.3 | 38.5 | 1.0 | 18.7 | 77.2 | 20.8 | 0.09 |
| 2.20 | 2004-09-07 | 35 | 460  | 38.4 | 36.3 | 0.8 | 16.5 | 73.6 | 27.8 | 0.05 |
| 2.21 | 2004-10-02 | 14 | 210  | 43.5 | 40.9 | 0.8 | 23.0 | 76.7 | 14.8 | 0.04 |

\*<sup>1</sup>) refers to valves < 31.5  $\mu\text{m}$  apical length

\*<sup>2</sup>) see Equation 1

For cup 1.04, sampling size was low ( $n=178$ ), even though this sample was taken within the productive period in late December 2002. Compared to the adjacent samples, valve density was unexpectedly sparse on the according slide. Also for cups 1.16, 2.01 and 2.21 sampling size was low (< 300), but here the slide density approximately accorded with the adjacent samples. We nevertheless decided to keep these measurements, since for the discussion of our results we mostly relate to smoothed general trends, which are not significantly changed by these samples.

## 1.10 Flux data

**Table S4.** Flux data from (Rigual-Hernández et al. 2015). Acronyms: BSiO<sub>2</sub>, biogenic silica; POC, particulate organic carbon.

| Cup  | Middle day of sampling period | Length of sampling period (d) | Total Mass Flux ( $\text{mg} \cdot \text{m}^{-2} \cdot \text{d}^{-1}$ ) | BSiO <sub>2</sub> ( $\text{mg} \cdot \text{m}^{-2} \cdot \text{d}^{-1}$ ) | BSiO <sub>2</sub> (%) | CaCO <sub>3</sub> ( $\text{mg} \cdot \text{m}^{-2} \cdot \text{d}^{-1}$ ) | CaCO <sub>3</sub> (%) | POC ( $\text{mg} \cdot \text{m}^{-2} \cdot \text{d}^{-1}$ ) | POC (%) | <i>F. kerguelensis</i> flux ( $10^6$ valves $\cdot \text{m}^{-2} \cdot \text{d}^{-1}$ ) | <i>F. kerguelensis</i> percentage of all diatoms |
|------|-------------------------------|-------------------------------|-------------------------------------------------------------------------|---------------------------------------------------------------------------|-----------------------|---------------------------------------------------------------------------|-----------------------|-------------------------------------------------------------|---------|-----------------------------------------------------------------------------------------|--------------------------------------------------|
| 1.01 | 2002-11-23                    | 10.0                          | 96.7                                                                    | 46.8                                                                      | 48                    | 18.3                                                                      | 19                    | 3.6                                                         | 4       | 3.2                                                                                     | 56.0                                             |
| 1.02 | 2002-12-03                    | 10.0                          | 190.6                                                                   | 110.6                                                                     | 58                    | 37.5                                                                      | 20                    | 4.6                                                         | 2       | 12.1                                                                                    | 43.6                                             |
| 1.03 | 2002-12-13                    | 10.0                          | 363.9                                                                   | 203.6                                                                     | 56                    | 81.0                                                                      | 22                    | 12.3                                                        | 3       | 25.1                                                                                    | 38.4                                             |
| 1.04 | 2002-12-23                    | 10.0                          | 240.7                                                                   | 134.0                                                                     | 56                    | 47.2                                                                      | 20                    | 11.4                                                        | 5       | 9.5                                                                                     | 26.3                                             |
| 1.05 | 2003-01-02                    | 10.0                          | 125.6                                                                   | 54.4                                                                      | 43                    | 45.4                                                                      | 36                    | 4.8                                                         | 4       | 3.0                                                                                     | 44.3                                             |
| 1.06 | 2003-01-12                    | 10.0                          | 158.9                                                                   | 93.7                                                                      | 59                    | 35.0                                                                      | 22                    | 5.4                                                         | 3       | 13.2                                                                                    | 71.7                                             |
| 1.07 | 2003-01-22                    | 10.0                          | 360.2                                                                   | 219.1                                                                     | 61                    | 68.9                                                                      | 19                    | 8.6                                                         | 2       | 21.1                                                                                    | 73.3                                             |
| 1.08 | 2003-02-01                    | 10.0                          | 213.8                                                                   | 113.7                                                                     | 53                    | 48.3                                                                      | 23                    | 5.5                                                         | 3       | 31.4                                                                                    | 69.7                                             |
| 1.09 | 2003-02-11                    | 10.0                          | 396.5                                                                   | 253.8                                                                     | 64                    | 56.0                                                                      | 14                    | 5.1                                                         | 1       | 20.9                                                                                    | 74.3                                             |

|      |            |      |       |       |    |      |    |     |    |      |      |
|------|------------|------|-------|-------|----|------|----|-----|----|------|------|
| 1.10 | 2003-02-21 | 10.0 | 60.8  | 26.6  | 44 | 23.7 | 39 | 2.2 | 4  | 6.9  | 40.5 |
| 1.11 | 2003-03-03 | 10.0 | 58.5  | 16.8  | 29 | 23.8 | 41 | 5.5 | 9  | 1.3  | 67.3 |
| 1.12 | 2003-03-13 | 10.0 | 89.3  | 26.6  | 30 | 37.0 | 41 | 7.0 | 8  | 0.9  | 63.1 |
| 1.13 | 2003-03-23 | 10.0 | 49.5  | 13.6  | 28 | 25.1 | 51 | 3.4 | 7  | 1.5  | 64.0 |
| 1.14 | 2003-04-02 | 10.0 | 33.5  | 7.6   | 23 | 18.2 | 54 | 2.7 | 8  | 0.8  | 78.0 |
| 1.15 | 2003-04-12 | 10.0 | 31.9  | 6.2   | 19 | 20.1 | 63 | 1.6 | 5  | 1.0  | 84.5 |
| 1.16 | 2003-04-22 | 10.0 | 21.6  | 5.8   | 27 | 14.0 | 65 | 1.0 | 4  | 0.6  | 78.7 |
| 1.17 | 2003-05-09 | 25.0 | 23.8  | 7.3   | 31 | 12.8 | 54 | 0.9 | 4  | 1.7  | 85.8 |
| 1.18 | 2003-06-11 | 40.0 | 23.7  | 10.8  | 46 | 7.8  | 33 | 1.0 | 4  | 1.4  | 86.7 |
| 1.19 | 2003-07-23 | 45.0 | 16.9  | 8.0   | 47 | 5.5  | 33 | 0.7 | 4  | 1.0  | 83.7 |
| 1.20 | 2003-08-25 | 20.0 | 33.6  | 13.5  | 40 | 11.9 | 35 | 1.8 | 5  | 2.1  | 81.0 |
| 2.01 | 2003-10-04 | 14.0 | 15.1  | 8.1   | 54 | 4.5  | 30 | 0.5 | 3  | 0.3  | 76.2 |
| 2.02 | 2003-10-18 | 14.0 | 23.4  | 12.6  | 54 | 7.0  | 30 | 0.8 | 3  | 0.8  | 73.9 |
| 2.03 | 2003-11-01 | 14.0 | 34.8  | 18.6  | 54 | 10.8 | 31 | 1.1 | 3  | 2.2  | 77.0 |
| 2.04 | 2003-11-15 | 14.0 | 121.0 | 54.6  | 45 | 19.9 | 16 | 2.0 | 2  | 9.9  | 85.8 |
| 2.05 | 2003-11-29 | 14.0 | 75.5  | 35.9  | 48 | 14.6 | 19 | 1.6 | 2  | 6.3  | 80.8 |
| 2.06 | 2003-12-13 | 14.0 | 178.6 | 111.6 | 62 | 40.2 | 23 | 3.6 | 2  | 10.9 | 55.0 |
| 2.07 | 2003-12-27 | 14.0 | 232.6 | 134.8 | 58 | 43.6 | 19 | 7.2 | 3  | 5.0  | 48.7 |
| 2.08 | 2004-01-10 | 14.0 | 182.0 | 114.5 | 63 | 33.7 | 19 | 6.2 | 3  | 20.2 | 65.2 |
| 2.09 | 2004-01-24 | 14.0 | 121.9 | 81.7  | 67 | 21.0 | 17 | 3.3 | 3  | 11.7 | 69.6 |
| 2.10 | 2004-02-07 | 14.0 | 63.9  | 37.0  | 58 | 10.8 | 17 | 2.7 | 4  | 7.3  | 65.7 |
| 2.11 | 2004-02-21 | 14.0 | 28.5  | 16.6  | 58 | 7.0  | 24 | 1.0 | 4  | 4.4  | 74.1 |
| 2.12 | 2004-03-06 | 14.0 | 31.0  | 18.4  | 59 | 7.7  | 25 | 0.9 | 3  | 4.6  | 73.7 |
| 2.13 | 2004-03-20 | 14.0 | 66.2  | 45.3  | 68 | 10.2 | 15 | 1.0 | 2  | 7.4  | 75.2 |
| 2.14 | 2004-04-03 | 14.0 | 84.6  | 52.6  | 62 | 16.9 | 20 | 0.8 | 1  | 8.9  | 76.9 |
| 2.15 | 2004-04-17 | 14.0 | 15.6  | 10.1  | 65 | 4.9  | 31 | 0.8 | 5  | 0.5  | 80.8 |
| 2.16 | 2004-05-01 | 14.0 | 10.6  | 6.9   | 65 | 4.0  | 38 | 0.5 | 4  | 0.6  | 87.2 |
| 2.17 | 2004-05-25 | 35.0 | 19.6  | 13.7  | 70 | 3.5  | 18 | 0.4 | 2  | 2.5  | 73.0 |
| 2.18 | 2004-06-29 | 35.0 | 19.3  | 11.3  | 59 | 4.5  | 23 | 1.1 | 6  | 1.2  | 75.8 |
| 2.19 | 2004-08-03 | 35.0 | 14.5  | 6.0   | 41 | 2.8  | 20 | 2.0 | 14 | 1.0  | 80.3 |
| 2.20 | 2004-09-07 | 35.0 | 10.3  | 5.0   | 49 | 3.8  | 37 | 0.5 | 5  | 1.0  | 90.3 |
| 2.21 | 2004-10-02 | 14.0 | 7.3   | 3.6   | 49 | 2.5  | 34 | 0.5 | 7  | 0.4  | 87.6 |

The flux data also is available at:

[https://data.aad.gov.au/metadata/records/AAS\\_4078\\_diatoms\\_biogenic\\_flux\\_subantarctic/](https://data.aad.gov.au/metadata/records/AAS_4078_diatoms_biogenic_flux_subantarctic/)

### 1.11 KS test results regarding RI

The results of Kolmogorov-Smirnov tests, assessing the influence of adding results from subsequent ranking indices, can be found in the file “KS test results regarding RI.pdf”.

### 1.12 References

BESZTERI B., ALLEN C., ALMANDOZ G.O., ARMAND L., BARCENA M.Á., CANTZLER H., CROSTA X., ESPER O., JORDAN R.W., KAUER G., KLAAS C., KLOSTER M., LEVENTER A., PIKE J. &

- RIGUAL HERNÁNDEZ A.S. 2018. Quantitative comparison of taxa and taxon concepts in the diatom genus *Fragilariopsis*: A case study on using slide scanning, multi-expert image annotation and image analysis in taxonomy. *Journal of Phycology* 54: 703-719. doi: 10.1111/jpy.12767
- BRADSKI G. & KAEHLER A. 2008. *Learning OpenCV : Computer vision with the OpenCV library*. O'Reilly, Sebastopol
- BRESENHAM J.E. 1965. Algorithm for computer control of a digital plotter. *IBM Systems journal* 4: 25-30. doi: 10.1147/sj.41.0025
- CORTESE G. & GERSONDE R. 2007. Morphometric variability in the diatom *Fragilariopsis kerguelensis*: Implications for Southern Ocean paleoceanography. *Earth and Planetary Science Letters* 257: 526-544. doi: 10.1016/j.epsl.2007.03.021
- FENNER J., SCHRADER H. & WIENIGK H. 1976. Diatom phytoplankton studies in the southern Pacific Ocean, composition and correlation to the Antarctic Convergence and its paleoecological significance. *Initial Reports of the Deep Sea Drilling Project* 35: 757-813. Doi: 10.2973/dsdp.proc.35.app3.1976
- KLOSTER M., ESPER O., KAUER G. & BESZTERI B. 2017. Large-scale permanent slide imaging and image analysis for diatom morphometrics. *Applied Sciences* 7: 330. doi: 10.3390/app7040330
- RIGUAL-HERNÁNDEZ A.S., TRULL T.W., BRAY S.G., CORTINA A. & ARMAND L.K. 2015. Latitudinal and temporal distributions of diatom populations in the pelagic waters of the Subantarctic and Polar Frontal Zones of the Southern Ocean and their role in the biological pump. *Biogeosciences Discuss.* 12: 8615-8690. doi: 10.5194/bgd-12-8615-2015
